1 **Regulation of Liprin- $\alpha$  phase separation by CASK is disrupted by a mutation in its CaM kinase domain**

2 Debora Tibbe<sup>1</sup>, Pia Ferle<sup>1</sup>, Christoph Krisp<sup>2</sup>, Sheela Nampoothiri<sup>3</sup>, Ghayda Mirzaa<sup>4,5,6</sup>, Melissa Assaf<sup>7</sup>,  
3 Sumit Parikh<sup>8</sup>, Kerstin Kutsche<sup>1</sup>, Hans-Jürgen Kreienkamp<sup>1,\*</sup>

4 <sup>1</sup>Institute for Human Genetics; University Medical Center Hamburg-Eppendorf; Martinistrasse 52,  
5 20246 Hamburg, Germany

6 <sup>2</sup>Institute for Clinical Chemistry and Laboratory Medicine; Mass Spectrometric Proteomics; University  
7 Medical Center Hamburg-Eppendorf; Martinistrasse 52, 20246 Hamburg, Germany

8 <sup>3</sup>Department of Pediatric Genetics; Amrita Institute of Medical Sciences & Research Centre; Cochin  
9 682041, Kerala, India

10 <sup>4</sup>Center for Integrative Brain Research, Seattle Children's Research Institute, Seattle, Washington, USA

11 <sup>5</sup>Department of Pediatrics, University of Washington, Seattle, Washington, USA

12 <sup>6</sup>Brotman Baty Institute for Precision Medicine, Seattle, WA 98195, US

13 <sup>7</sup>Banner Children's Specialists Neurology Clinic, Glendale, AZ, USA

14 <sup>8</sup>Pediatric Neurology; Cleveland Clinic, Cleveland, Ohio, USA

15

16 Running Title: CASK controls Liprin- $\alpha$ 2 phase separation

17

18 \*Correspondence should be addressed to

19 Hans-Jürgen Kreienkamp

20 Institute for Human Genetics

21 University Medical Center Hamburg-Eppendorf

22 Martinistrasse 52

23 20246 Hamburg

24 Germany

25 e-mail: Kreienkamp@uke.de

26

27

28

29 **Abstract.**

30 CASK is a unique membrane associated guanylate kinase (MAGUK), due to its Ca<sup>2+</sup>/calmodulin-  
31 dependent kinase (CaMK) domain. We describe four male patients with a severe neurodevelopmental  
32 disorder with microcephaly carrying missense variants affecting the CaMK domain. One boy who  
33 carried the p.E115K variant and died at an early age showed pontocerebellar hypoplasia (PCH) in  
34 addition to microcephaly, thus exhibiting the classical MICPCH phenotype observed in individuals with  
35 CASK loss-of-function variants. All four variants selectively weaken the interaction of CASK with Liprin-  
36 α2, a component of the presynaptic active zone. Liprin-α proteins form spherical condensates in a  
37 process termed liquid-liquid phase separation (LLPS), which we observe here in Liprin-α2  
38 overexpressing HEK293T cells and primary cultured neurons. Condensate formation is reversed by  
39 interaction of Liprin-α2 with CASK; this is associated with altered phosphorylation of Liprin-α2. The  
40 p.E115K variant fails to interfere with condensate formation. As the individual carrying this variant had  
41 the severe MICPCH disorder, we suggest that regulation of Liprin-α2-mediated LLPS is a new functional  
42 feature of CASK which must be maintained to prevent PCH.

43

## 44 Introduction

45 Perturbations in synapse formation, synaptic protein complexes and synaptic transmission are  
46 associated with neurodevelopmental disorders in humans (Bourgeron, 2015; Grubucker *et al*, 2011).  
47 Both pre- and postsynaptically, large protein complexes are formed which contribute to synaptic  
48 architecture and function. One such complex, the presynaptic active zone, consists of a dense network  
49 of core constituents ELKS, Liprin- $\alpha$ , RIM, RIM-BP and Munc13. The active zone complex is held together  
50 through multiple interactions via highly conserved domains such as C<sub>2</sub>, PDZ and SH3 domains (Sudhof,  
51 2012). Recently, it became clear that active zone assembly also relies on a process termed liquid-liquid  
52 phase separation (LLPS), which involves the recruitment of proteins into condensates mediated by  
53 multiple intrinsically disordered regions (IDRs) (Emperador-Melero *et al*, 2021; Liang *et al*, 2021; Xie *et*  
54 *al*, 2021).

55 The active zone is required for the recruitment of synaptic vesicles to release sites precisely opposite  
56 to postsynaptic specializations containing the appropriate neurotransmitter receptors (Sudhof, 2012).  
57 This positioning requires transsynaptic adhesion complexes such as the Neurexin/Neuroigin pair of  
58 adhesion molecules (Sudhof, 2008). Neurexins are linked to the active zone through the  
59 Ca<sup>2+</sup>/calmodulin-dependent serine protein kinase CASK (Hata *et al*, 1996). CASK binds to Neurexins via  
60 its C-terminal PDZ-SH3-GK (PSG) module (Hata *et al.*, 1996; Li *et al*, 2014; Pan *et al*, 2021), whereas the  
61 N-terminal CaM-dependent kinase domain (CaMK domain) is involved in protein interactions with  
62 Liprin- $\alpha$  (LaConte *et al*, 2016; Wei *et al*, 2011). Additional interactions with Mint1, also through the  
63 CaMK domain, and Lin/Veli proteins through the L27.2 domain, establish CASK as a multivalent scaffold  
64 protein (Butz *et al*, 1998; Tabuchi *et al*, 2002). The CaMK domain exhibits a Mg<sup>2+</sup>-sensitive, atypical  
65 kinase activity which may phosphorylate the Neurexin C-terminus (Mukherjee *et al*, 2008). The  
66 functional relevance of this activity is unclear. In addition to its presynaptic role, CASK has been  
67 reported to act as a transcriptional regulator during neuronal development (Hsueh *et al*, 2000) and as  
68 a regulator of postsynaptic glutamate receptor trafficking (Jeyifous *et al*, 2009).

69 Loss-of-function variants in the X-chromosomal *CASK* gene lead to microcephaly with pontine and  
70 cerebellar hypoplasia (MICPCH) and intellectual disability (ID) in females in the heterozygous state and  
71 in males in the hemizygous state. Furthermore, several missense variants have been described which  
72 are associated with neurodevelopmental disorders of variable severity. These variants mostly affect  
73 males and are often inherited from healthy mothers (Hackett *et al*, 2010; Najm *et al*, 2008; Pan *et al.*,  
74 2021).

75 So far, the pathogenic mechanisms of *CASK* mutations remain unclear; in particular, it is unknown why  
76 some variants cause ID, while others are associated also with pontocerebellar hypoplasia (PCH). As  
77 *CASK* fulfils multiple functions at the pre- and postsynapse and in the nucleus, we do not know which  
78 of these apparently separate functions contributes most strongly to the patient's phenotype. We have  
79 begun to address this by analysing a larger number of missense variants with respect to interactions  
80 with a panel of known *CASK* associated proteins. Our initial data indicated that the presynaptic role of  
81 *CASK* was affected in most cases, as most variants interfered with Neurexin binding (Pan *et al.*, 2021).  
82 Here, we identify four male patients carrying missense variants in the CaMK domain of *CASK*. All four  
83 variants selectively interfere with Liprin- $\alpha$ 2 binding, strongly supporting a disturbed presynaptic  
84 function of *CASK* as a major pathogenic mechanism. Importantly, we also observe that in human cells  
85 and in neurons, Liprin- $\alpha$ 2 undergoes formation of spherical condensates. This process can be reversed  
86 by interaction with *CASK*, but not by a *CASK* variant which is deficient in Liprin- $\alpha$ 2 binding. Our data

87 uncover a new aspect of the molecular function of CASK which may be relevant for proper formation  
88 of the presynaptic active zone.

## 89 Results.

90 **Missense variants altering the CaMK domain of CASK.** Four novel hemizygous missense variants  
91 (p.E115K, p.R255C, p.R264K and p.N299S) in *CASK* were identified in male patients, leading to  
92 substitutions in the CaMK domain (Fig. 1, A). All four patients were severely affected by microcephaly,  
93 severe developmental delay, intellectual disability and seizures (Table 1). Patient 1 (p.E115K) stands  
94 out as he additionally showed PCH and thus had the MICPCH disorder, usually associated with *CASK*  
95 loss-of-function mutations. This patient died at a young age. Previously, only three further missense  
96 variants in the CaMK domain have been reported, namely p.G178R, p.L209P and p.Y268H (González-  
97 Roca *et al.*, 2020; Hackett *et al.*, 2010; LaConte *et al.*, 2019). As it is unclear how N-terminal variants  
98 affect protein function, we analysed the functional relevance of the new variants identified here.

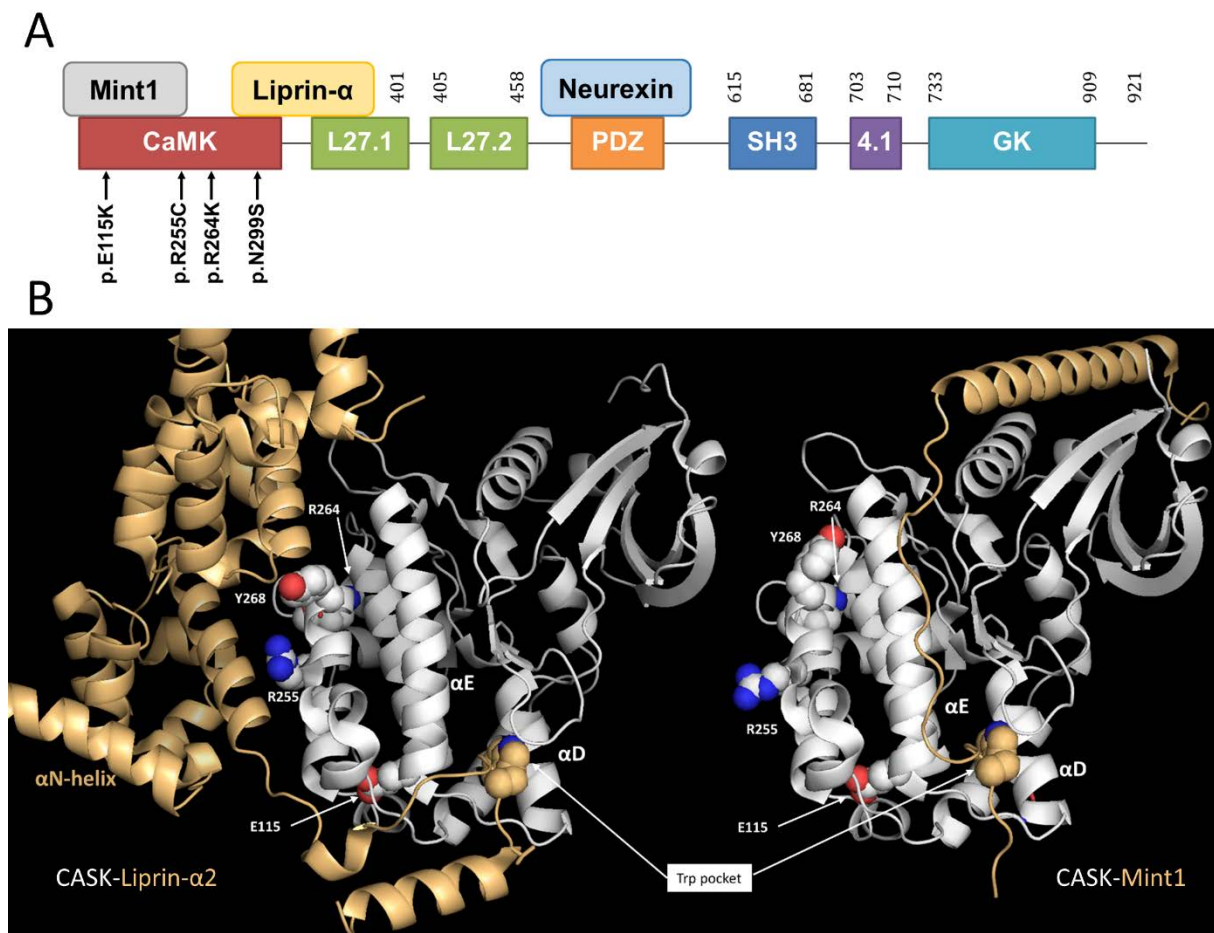

99

100 **Fig. 1. Identification of missense variants affecting the CaMK domain of CASK.** **A.** Protein domains of CASK,  
101 selected interaction partners and missense variants in the *CASK* gene identified here. Numbering refers to the  
102 database entry NP\_003679.2. **B.** Comparison of CASK-Liprin-α2 and CASK-Mint1 complexes. The positions of  
103 residues analysed here is indicated, with the exception of N299 in the αR1-helix which is occluded by the αD-  
104 helix. Note that while the hydrophobic tryptophan pocket is occupied in an identical manner in both complexes,  
105 both complexes differ in their secondary binding site, with a cluster of mutants (R255C, R264K, as well as Y268H  
106 analysed by (Wei *et al.*, 2011)) affecting only the secondary site for Liprin-α2. For Liprin-α2, the position of the  
107 αN-helix is also indicated which is pointing away from the SAM domains upon complex formation with CASK.  
108 Structures were derived from database entries 3tac in case of Liprin-α2 (Wei *et al.*, 2011) and 6kmh in case of  
109 Mint1 (Zhang *et al.*, 2020) and visualized with Pymol.

110 To assess the potential of the CASK mutants to disrupt specific functions of CASK, we looked at 3D  
111 crystal structures of the CASK CaMK domain in complexes with Mint1 and Liprin- $\alpha$ 2, two prominent  
112 presynaptic partners of CASK. Both Mint1 and Liprin- $\alpha$ 2 use the insertion of a tryptophan side chain  
113 which is part of a conserved Ile/Val-Trp-Val sequence (Trp981 in Liprin- $\alpha$ 2) into a deep hydrophobic  
114 pocket in CASK (Wei *et al.*, 2011; Wu *et al.*, 2020). This pocket is formed between the  $\alpha$ D and  $\alpha$ E helices  
115 of the kinase domain (Fig. 1, B). As the  $\alpha$ D helix is intimately connected to the  $\alpha$ R1 helix in CASK, it is  
116 conceivable that the N299S variant in  $\alpha$ R1 might alter the hydrophobic pocket. The E115K variant in  
117  $\alpha$ E is likely to affect the position of  $\alpha$ E, thereby changing the size of the pocket. Liprin- $\alpha$ 2 requires a  
118 second interface for high affinity binding, which is formed by its SAM2 domain. For CASK, this involves  
119 part of the CaMK surface containing residues R255, R264 and Y268. The substitutions R255C and R264K  
120 (as well as Y268H, analysed by (Wei *et al.*, 2011)) therefore are likely to affect the second interface  
121 between CASK and the SAM2 domain of Liprin- $\alpha$ 2.

122 **Binding to Mint1 and Neurexin is not affected whereas binding to Veli and ATP is slightly altered by**  
123 **missense variants affecting the CASK CaMK domain.** CASK forms an evolutionarily conserved trimeric  
124 complex with Mint1 and Veli proteins (Butz *et al.*, 1998). The interaction between CASK and Mint1 is  
125 mediated by the CaMK domain of CASK (Wu *et al.*, 2020; Zhang *et al.*, 2020). We tested whether the  
126 variants altered binding of CASK to Mint1 or Veli. HEK293T cells were cotransfected with plasmids  
127 coding for mRFP-tagged CASK variants (or mRFP alone as negative control) and GFP-tagged Mint1. Veli  
128 proteins are highly expressed endogenously in HEK293T cells and were visualized in two bands at about  
129 26 and 30 kDa, corresponding to Veli1 at 30 kDa and Veli2/3 at 26 kDa. Upon cell lysis and  
130 immunoprecipitation of mRFP-containing proteins, we found that all CASK mutant variants interact  
131 consistently well with Mint1 and Veli proteins. Veli2/3 were more prominent in the IP sample  
132 compared to Veli1 (Fig. 2, A). The E115K variant co-precipitated slightly more Veli proteins than CASK-  
133 WT and the remaining mutants (Fig. 2, A-C).

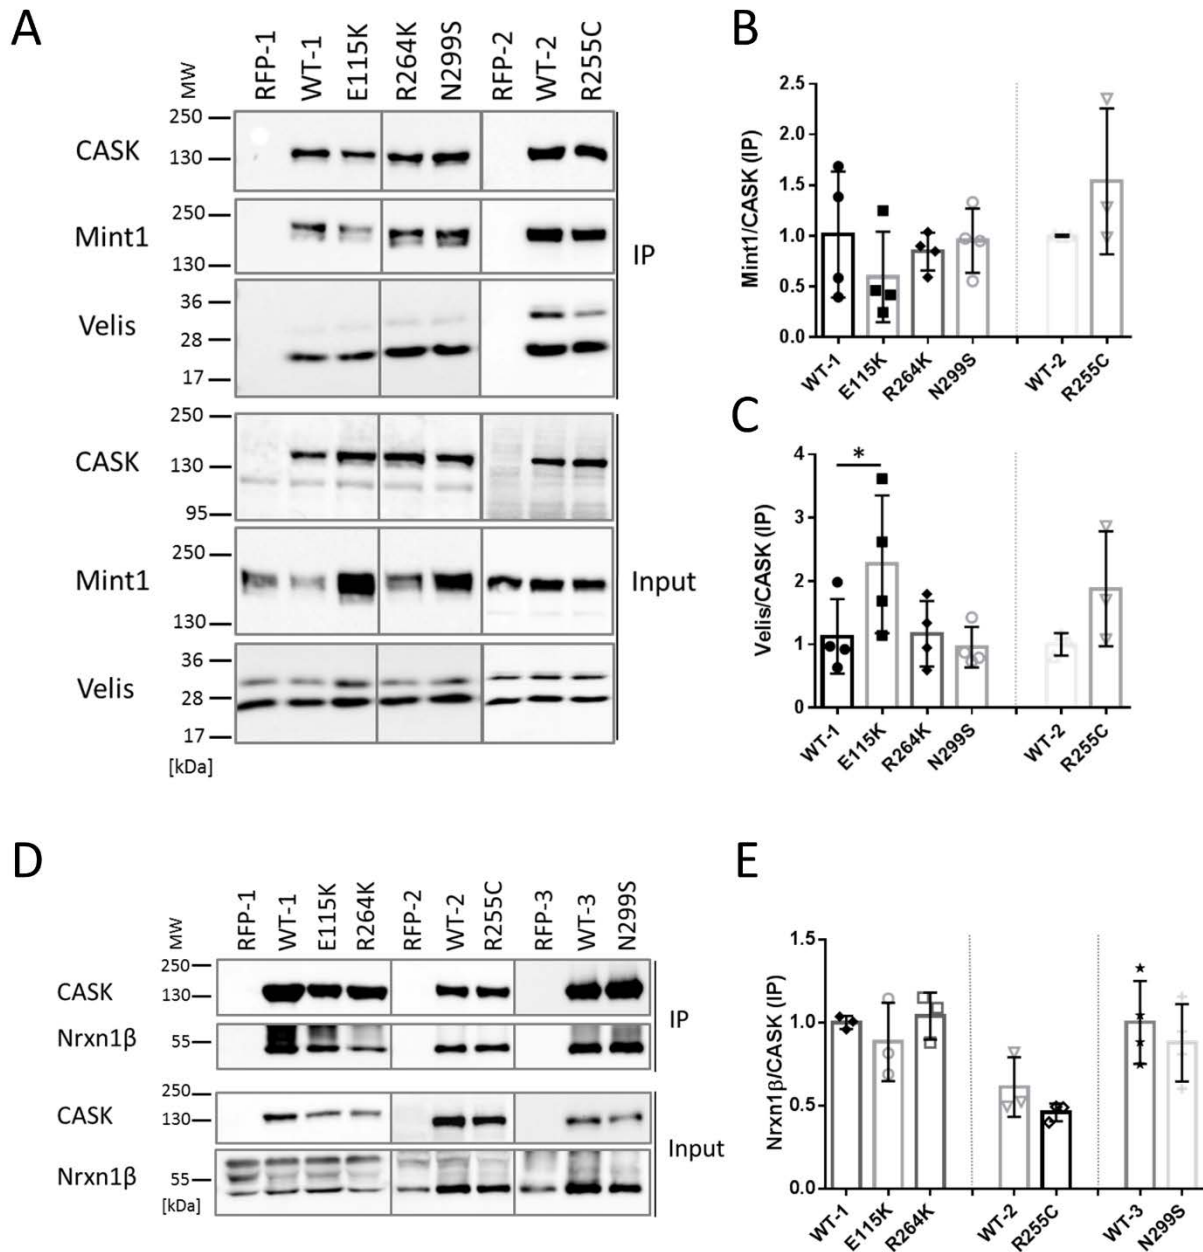

134

135 **Fig. 2. Substitutions in the CaMK domain of CASK do not alter interactions with Mint1 and Neurexin whereas**  
 136 **binding to Veli is slightly increased for the E115K variant.** **A.** mRFP-tagged CASK-WT and mutants, or mRFP alone  
 137 were coexpressed with Mint1 in HEK293T cells. mRFP-tagged proteins were immunoprecipitated from cell  
 138 lysates, and inputs (IN) and precipitates (IP) were analysed by western blotting using antibodies against GFP- and  
 139 mRFP-tags, as well as anti-Veli. **B.** **C.** Quantitative analysis of results shown in B. Coprecipitation efficiency was  
 140 determined as the ratio of Mint1 (B) or Veli (C) IP signal, divided by the CASK IP signal. **D.** **E.** mRFP-tagged CASK  
 141 variants were coexpressed with HA-tagged Neurexin, and mRFP-tagged proteins were immunoprecipitated as in  
 142 B. Quantitation in E shows that Neurexin-1β binding was not affected by CASK variants. The mean ± SD is shown  
 143 with each data point representing an independent transfection experiment. Significance was determined by one-  
 144 way ANOVA with *post hoc* Dunnett's multiple comparisons test or two-tailed Student's *t*-test; \*,  $p \leq 0.05$ ;  $n = 3-4$ .

145 The C-terminal PDZ ligand of Neurexins binds to the PDZ domain of CASK (Hata *et al.*, 1996). Structural  
 146 work has shown that the full PSG superdomain is necessary for high affinity interaction (Li *et al.*, 2014)  
 147 and oligomerization (Pan *et al.*, 2021). Importantly, the C-terminus of Neurexin is the only known *in*  
 148  *vivo* substrate for the CASK CaM kinase activity (Mukherjee *et al.*, 2010; Mukherjee *et al.*, 2008),  
 149 suggesting the possibility that alterations in the CaMK domain might affect the interaction between

150 both proteins. To test this, HEK293T cells were transiently transfected with plasmids coding for mRFP-  
 151 CASK and HA-Neurexin-1 $\beta$ . As before, mRFP-tagged CASK variants (or mRFP as control) were  
 152 immunoprecipitated from cell lysates. Amounts of CASK and coprecipitated Neurexin were analysed  
 153 by western blot and quantified (Fig. 2, D and E). With all CASK variants, Neurexin-1 $\beta$  was  
 154 coimmunoprecipitated efficiently and no differences with respect to the CASK-Neurexin interaction  
 155 were detected.

156 For measurement of ATP binding to the active site of the kinase domain we employed the fluorescent  
 157 ATP analog TNP-ATP. WT and mutant CASK kinase domains were expressed as His<sub>6</sub>-tag-SUMO fusion  
 158 proteins in bacteria and purified. Binding of TNP-ATP to both WT and mutant CASK kinase domains  
 159 could be verified by a shift of the fluorescence spectrum of TNP-ATP to lower wavelengths, and an  
 160 increase in fluorescence intensity (Fig. 3, A). TNP-ATP binding was reduced in the presence of Mg<sup>2+</sup>, in  
 161 keeping with the designation of CASK as an atypical, Mg<sup>2+</sup>-sensitive instead of Mg<sup>2+</sup>-dependent, kinase  
 162 (Mukherjee *et al.*, 2008). ATP binding to all CASK variants proved to be Mg<sup>2+</sup> sensitive. By calculating  
 163 the ratio of fluorescence in the absence and in the presence of Mg<sup>2+</sup> as the “Mg<sup>2+</sup> sensitivity” we  
 164 determined that the R264K and N299S variants of CASK were significantly more sensitive to Mg<sup>2+</sup> than  
 165 the WT protein and the other mutants, E115K and R255C (Fig. 3, B and C).

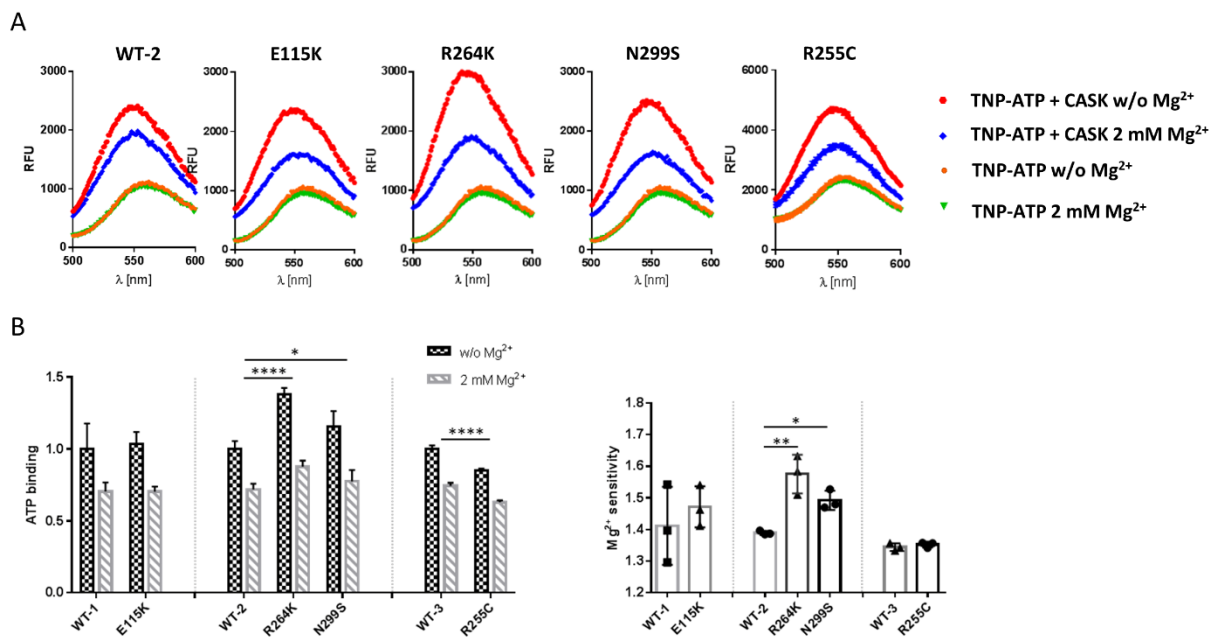

166

167 **Fig. 3. Mg<sup>2+</sup>-sensitivity of ATP binding is slightly altered by R264K and N299S variants of CASK.** SUMO-tagged  
 168 fusion proteins of the CaMK domain of CASK were purified and incubated with the fluorescent ATP analog TNP-  
 169 ATP in the absence or presence of 2 mM Mg<sup>2+</sup> and fluorescence emission spectra were recorded from 500 nm  
 170 to 600 nm. **B, C.** Quantification of the maxima of fluorescence signal in the absence and presence of Mg<sup>2+</sup> (B),  
 171 and of the ratio between the two values, defined as the “Mg<sup>2+</sup> sensitivity” (C). Significance was determined by  
 172 (B) two-way ANOVA with Sidak’s multiple comparison test or (C) one-way ANOVA with Dunnett’s multiple  
 173 comparisons test or two-tailed Student’s *t*-test; \*, *p*≤0.05, \*\*, *p*≤0.01; \*\*\*\*, *p*≤0.0001; *n*=3. Mean ± *SD* is shown.  
 174 In C, each data point represents an independent fusion protein purification.

175 **Reduced binding to Liprin- $\alpha$ 2.** To analyse whether binding to the active zone component Liprin- $\alpha$ 2  
 176 (LaConte *et al.*, 2016; Olsen *et al.*, 2005) is affected, HEK293T cells were transfected with plasmids  
 177 coding for either a CASK variant or the empty vector control together with a construct coding for HA-  
 178 tagged Liprin- $\alpha$ 2. Upon immunoprecipitation of mRFP-tagged proteins, we found that all four tested  
 179 CaMK mutants showed a significant reduction in interaction with Liprin- $\alpha$ 2 compared to CASK-WT (Fig.

180 4, A and B). We repeated this assay in a different format, using an immobilized SUMO fusion protein  
 181 of the three C-terminal SAM domains of Liprin- $\alpha$ 2, which contain the CASK binding loop (Wei *et al.*,  
 182 2011), in a pulldown assay from HEK293T cells expressing the different mRFP-tagged CASK variants.  
 183 Here, we similarly observed differences between CASK-WT and the four mutants, as significantly  
 184 reduced binding was detected for E115K, R255C and R264K. The reduction in binding for the N299S  
 185 variant was not significant after three repeats (Fig. 4, C and D).

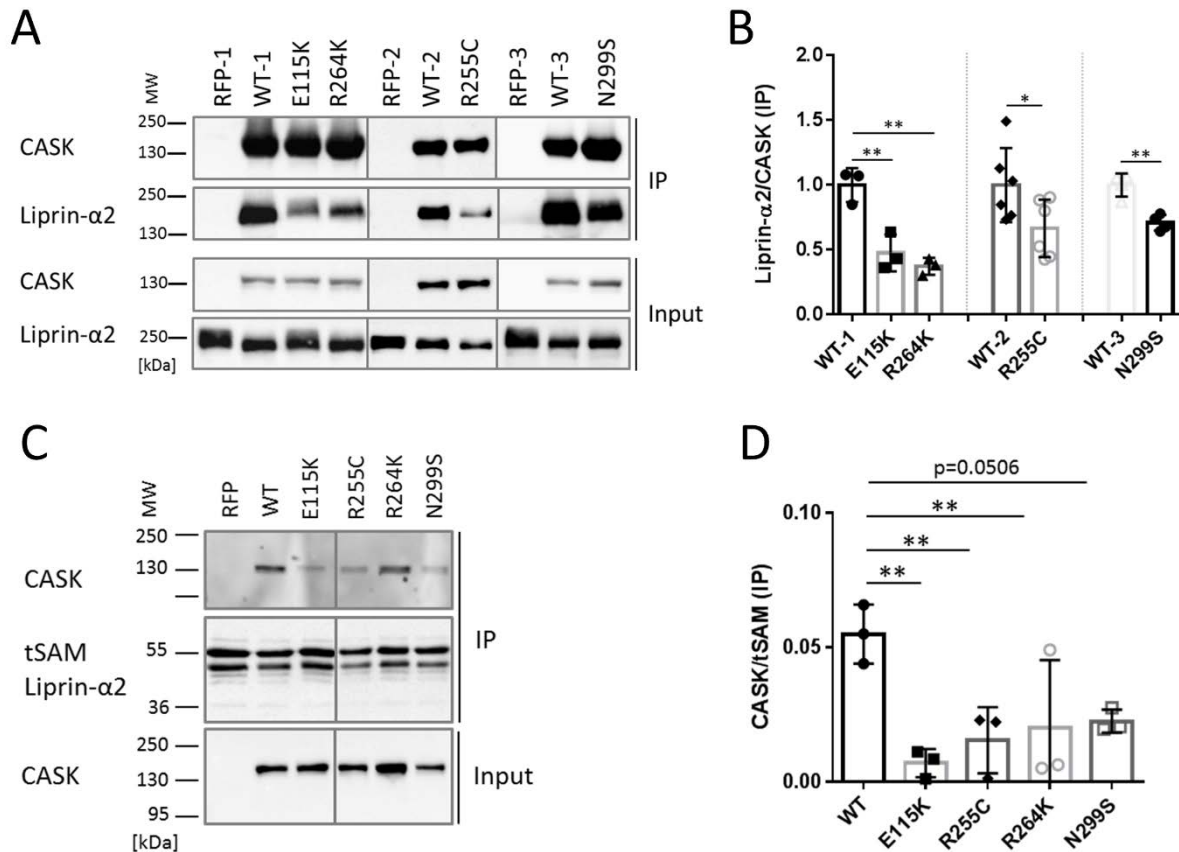

186

187 **Fig. 4. All four CASK variants interfere with binding to Liprin- $\alpha$ 2.** A. HA-tagged Liprin- $\alpha$ 2 was coexpressed with  
 188 mRFP or mRFP-tagged CASK variants. mRFP-containing proteins were immunoprecipitated from cell lysates, and  
 189 input and precipitate samples were analysed by western blotting using epitope-specific antibodies. B.  
 190 Quantification of the data shown in A as mean  $\pm$  SD. Precipitation efficiency is in each case quantified as the ratio  
 191 of precipitated HA-Liprin signal divided by precipitated mRFP-CASK signal. C. A His<sub>6</sub>-Sumo fusion protein of the  
 192 region encompassing the C-terminal three SAM domains of Liprin- $\alpha$ 2 (tSAM) was isolated from bacteria using Ni-  
 193 NTA agarose and left on agarose beads for use in a pull-down assay. Beads were incubated with lysates from cells  
 194 expressing mRFP alone or mRFP-tagged CASK variants. After washing, input and precipitate samples were  
 195 analysed by western blotting using the antibodies indicated. D. Quantification of the data in C shown as mean  $\pm$   
 196 SD. Interaction was quantified as the ratio of CASK signal in precipitates, divided by the signal of the tSAM  
 197 domains. Statistics in (B) and (D) done with two-tailed Student's *t*-test or one-way ANOVA followed by Dunnett's  
 198 multiple comparison test, respectively; \*,  $p < 0.05$ , \*\*,  $p < 0.01$ ;  $n = 3-6$ .

199 One might ask why binding of CASK to Liprin is reduced by the variants whereas binding to Mint1 is  
 200 not. Mint1 also uses the hydrophobic pocket of CASK for insertion of its Val-Trp-Val sequence;  
 201 however, Mint1 uses a second binding interface distinct from that of Liprin- $\alpha$ 2. This involves a stretch  
 202 of  $\alpha$ -helix which makes an extensive contact to the N-lobe of the CASK CaMK domain (Fig. 1, B)  
 203 (LaConte *et al.*, 2016; Wu *et al.*, 2020), allowing for a much higher affinity of the Mint1-CASK interaction  
 204 (Wu *et al.*, 2020). We think that Mint1 is not affected by the variants because (a) R255 and R264 are  
 205 in the second interface for Liprin- $\alpha$ 2 but not for Mint1 (Fig. 1, B); and (b) because the second interface



206 for Mint1 provides more strength to the interaction. Thus, disruption of the hydrophobic pocket for  
207 the Trp side chain can be partially compensated by the second interface of Mint1, but not of Liprin- $\alpha$ 2.

208 We focused further on the interaction between CASK and Liprin- $\alpha$ 2. In Fig. 4, A; and more pronounced  
209 in Fig. 5, A; we noted that the Liprin- $\alpha$ 2 band in western blot analysis smeared and was shifted to  
210 higher molecular weights when coexpressed with mRFP from the empty vector, but not when  
211 coexpressed with CASK-WT. Upward smearing of Liprin- $\alpha$ 2 was also observed when CASK-E115K was  
212 coexpressed; R264K and N299S showed a somewhat intermediary effect (Fig. 5, A). As we suspected a  
213 phosphorylation event, lysates of cells expressing mRFP-CASK or mRFP alone together with Liprin- $\alpha$ 2  
214 were treated with FastAP phosphatase. This treatment eliminated the shift to higher molecular weight  
215 (Fig. 5, B). Coexpression of CASK-WT with Liprin- $\alpha$ 2 led to higher electrophoretic mobility of Liprin- $\alpha$ 2,  
216 which was similar to that of the phosphatase treated samples in the absence of CASK. No further  
217 increase in mobility was observed when the CASK+Liprin- $\alpha$ 2 samples were treated with phosphatase  
218 (Fig. 5, B). As a conclusion, Liprin- $\alpha$ 2 is phosphorylated in 293T cells in the absence of CASK;  
219 coexpression of CASK-WT but not CASK-E115K interfered with this phosphorylation event in Liprin- $\alpha$ 2.

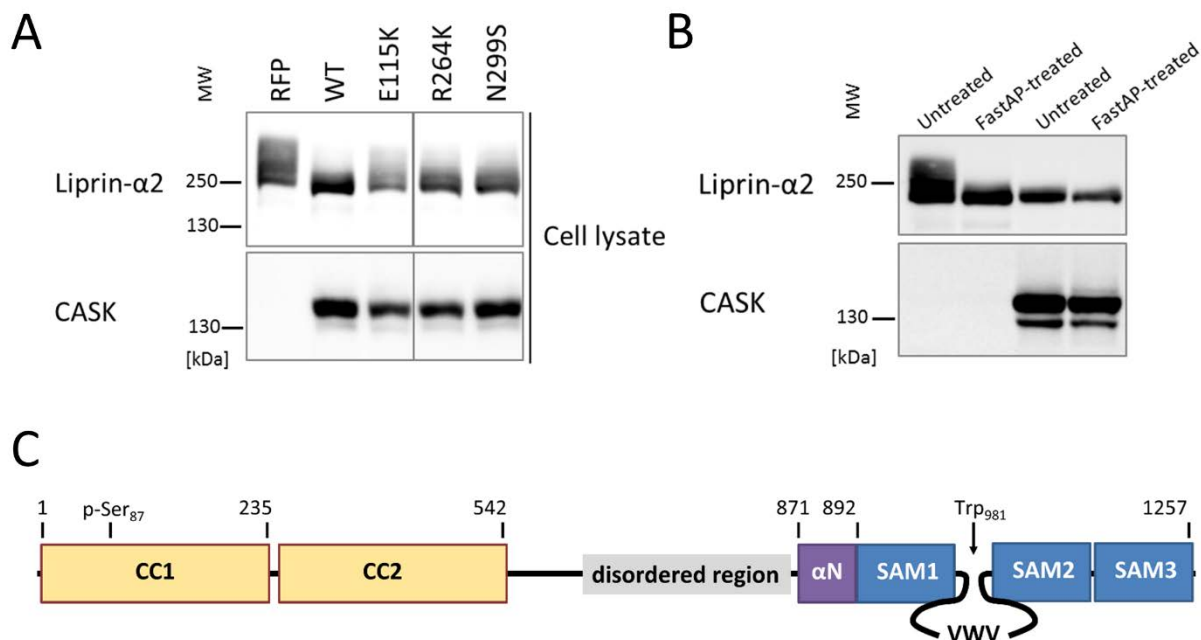

220

221 **Fig. 5. Interaction with CASK alters the phosphorylation status of Liprin- $\alpha$ 2.** A. Lysates from cells coexpressing  
222 HA-tagged Liprin- $\alpha$ 2 with mRFP or mRFP-tagged variants of CASK were analysed by SDS-PAGE on an 8 % gel,  
223 followed by western blotting. Note the upward smear of the Liprin- $\alpha$ 2 specific band, which is abolished by  
224 coexpression with CASK-WT but not by CASK mutants. B. Lysates from cells coexpressing HA-tagged Liprin- $\alpha$ 2  
225 with mRFP or mRFP-tagged CASK\_WT were treated with or without the FastAP alkaline phosphatase, followed  
226 by analysis by SDS-PAGE on an 8 % gel and western blotting. C. Domain structure of Liprin- $\alpha$ 2; the positions of  
227 Ser87 which is most strongly phosphorylated in the absence of CASK, and of Trp981, which constitutes a major  
228 binding interface for CASK, are indicated. CC, coiled coil.

229 We determined phosphorylation sites by mass spectroscopic analysis of immunoprecipitated Liprin- $\alpha$   
230  $\alpha$ 2, isolated from cells coexpressing mRFP control vector, or coexpressing mRFP-tagged CASK.  
231 Numerous phosphorylated sites were detected in the N-terminal coiled-coil regions (i.e. S73, S87,  
232 S257, S260, S263) and the intervening IDR (S552 and S673). Remarkably, phosphorylation of S87 in  
233 coiled-coil region 1 was decreased when CASK was coexpressed in three independent repeats (Fig. 5,  
234 C, Table 2).

235 Liprin- $\alpha$  proteins from various species form condensates in cells through a process termed liquid-liquid  
236 phase separation (LLPS) (Emperador-Melero *et al.*, 2021; Liang *et al.*, 2021; McDonald *et al.*, 2020; Xie  
237 *et al.*, 2021). During LLPS, proteins form dynamic, non-membrane surrounded compartments through  
238 demixing from the diffuse state out of the cytosol (Bracha *et al.*, 2019). The homolog of Liprin- $\alpha$  in *C.*  
239 *elegans* (SYD-2) exhibits liquid-liquid phase separation in early stages of synapse development  
240 (McDonald *et al.*, 2020). Upon microscopic analysis of Liprin- $\alpha$ 2 expressing 293T cells, we observed  
241 large spherical condensates of Liprin- $\alpha$ 2 which appeared to be LLPS-like events such as those observed  
242 by (Emperador-Melero *et al.*, 2021) (Fig. 6). Coexpression of Liprin- $\alpha$ 2 with CASK-WT resulted in a  
243 diffuse cytosolic localization for both proteins in the majority of analysed cells. This CASK-dependent  
244 change of intracellular localization from bigger condensates to a cytosolic diffuse localization was also  
245 observed upon coexpression with CASK variants R255C, R264K and N299S (Fig. 6). In a striking contrast,  
246 the localization of Liprin- $\alpha$ 2 resembled that observed in the absence of overexpressed CASK when the  
247 CASK-E115K variant was coexpressed. CASK-E115K colocalized with Liprin- $\alpha$ 2 in the large condensates  
248 that were formed (Fig. 6). Thus, CASK was able to negatively regulate condensate formation, and CASK-  
249 E115K failed to do so. To further investigate this phenomenon, we performed a time resolved series  
250 of experiments. Here, cells were first transfected with the Liprin- $\alpha$ 2 construct to allow for formation  
251 of spherical droplets. On the next day, cells were transfected again with CASK expression vectors. Here  
252 we observed that CASK-WT was indeed able to “dissolve” preformed condensates of Liprin- $\alpha$ 2 (Fig. 7).

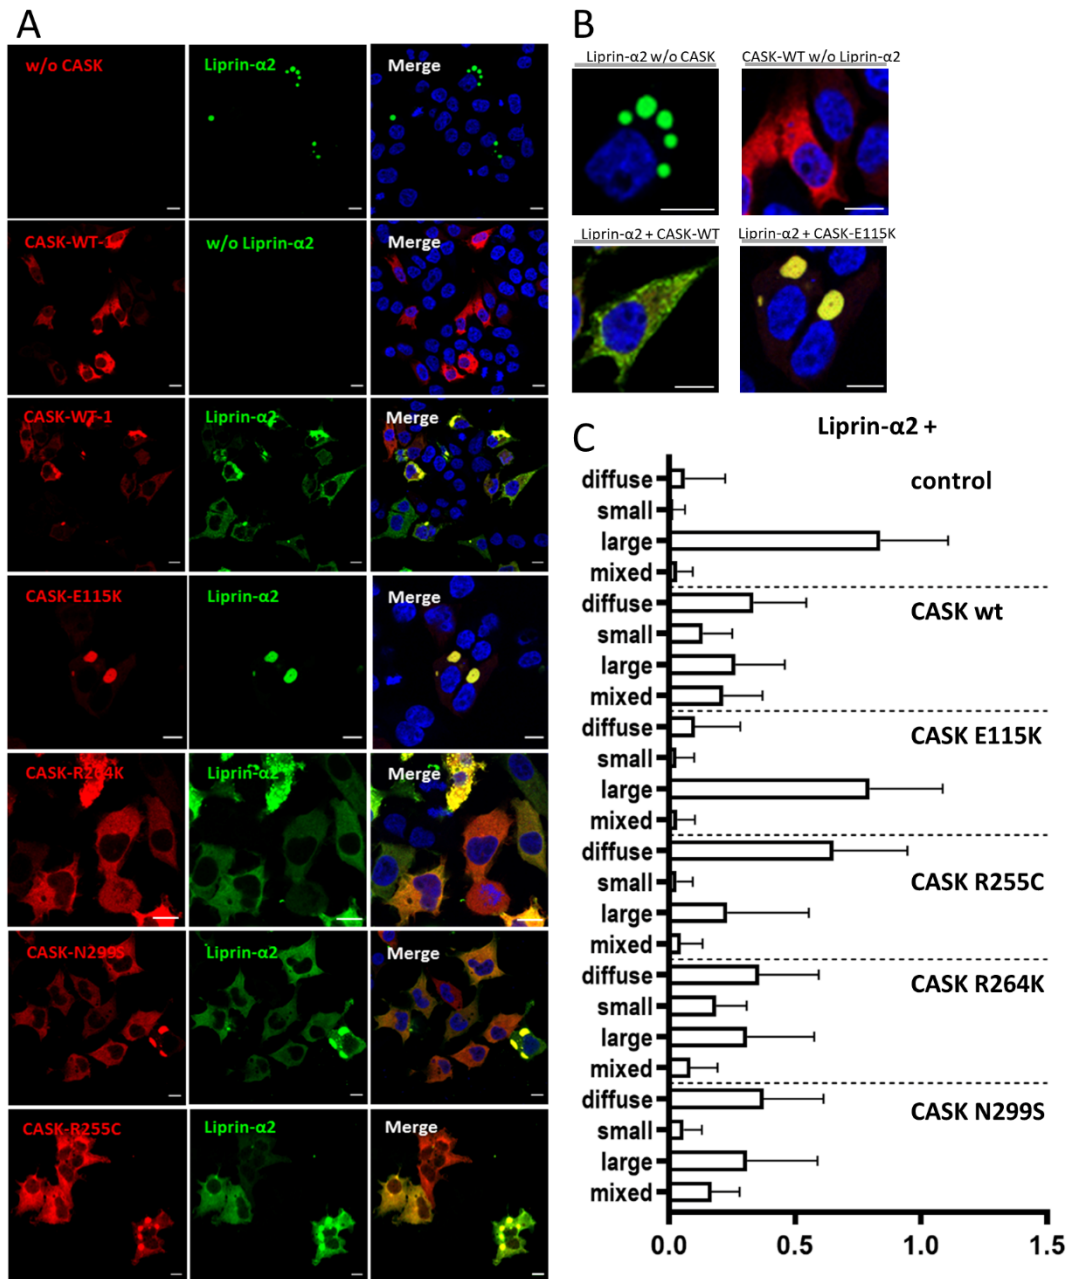

253

254 **Fig. 6. Interaction with CASK interferes with formation of spherical condensates by Liprin-α2 in HEK293T cells.**  
 255 **A.** 293T cells expressing GFP-Liprin-α2, mRFP-tagged CASK, or combinations of both proteins were fixed and  
 256 imaged by confocal microscopy. Images of DAPI-stained nuclei were included in merged pictures. **B.**  
 257 Enlargements of cells expressing GFP-Liprin-α2 or mRFP-CASK-WT alone, or combinations of GFP-Liprin-α2  
 258 WT or E115K-mutant CASK. **C.** Quantification of data shown in A. Five microscopic fields of view were evaluated  
 259 per independent experiment. All transfected cells were grouped by the following criteria: diffuse; small clusters,  
 260 large clusters, mixed small and large clusters. Shown is the percentage of cells in each group based on the total  
 261 number of transfected and analysed cells. For each condition, three independent experiments with a total of  
 262 more than 90 cells were evaluated.

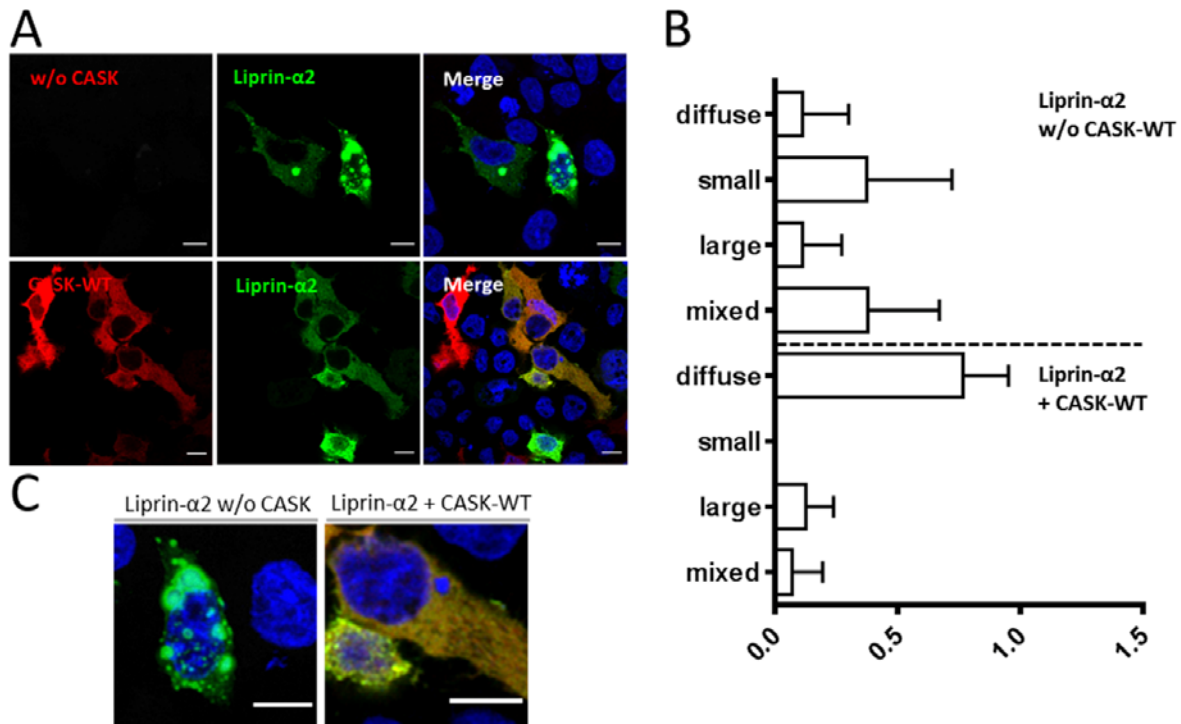

263

264 **Figure 7. CASK-WT negatively regulates preformed LLPS-like condensates of Liprin- $\alpha$ 2.** **A.** HEK293T cells were  
265 transfected with an expression vector for GFP-tagged Liprin- $\alpha$ 2. After two days, cells were fixed and processed  
266 for confocal microscopy (upper panels). Alternatively, cells were retransfected with mRFP-CASK after one day,  
267 and fixed on the second day. **B.** Quantitative analysis of the data shown in A; categorization and counting of cells  
268 was performed as described in Fig. 6. **C.** Enlargement of typical cells shown in A.

269 In the next set of experiments we asked how CASK and Liprin- $\alpha$ 2 affected their mutual localization in  
270 primary cultured hippocampal neurons. Here, Liprin- $\alpha$ 2 expressed alone was found in condensates  
271 throughout the cell bodies, dendrites and axons of transfected neurons. Upon coexpression of CASK-  
272 WT, this situation changed as both Liprin- $\alpha$ 2 and CASK were localized in a diffuse pattern throughout  
273 the cell. Again, the CASK-E115K variant failed to alter the distribution of Liprin- $\alpha$ 2, as before in 293T  
274 cells (Fig. 8). Closer inspection of axons showed that CASK-WT and Liprin- $\alpha$ 2 frequently colocalized at  
275 vGlut1-positive, presumably presynaptic terminals. In contrast, the large LLPS-like condensates  
276 observed in cells coexpressing CASK-E115K and Liprin- $\alpha$ 2, were found along the axon but were not  
277 colocalized with vGlut1, indicating that these are not functional synaptic sites (Fig. 9).

A

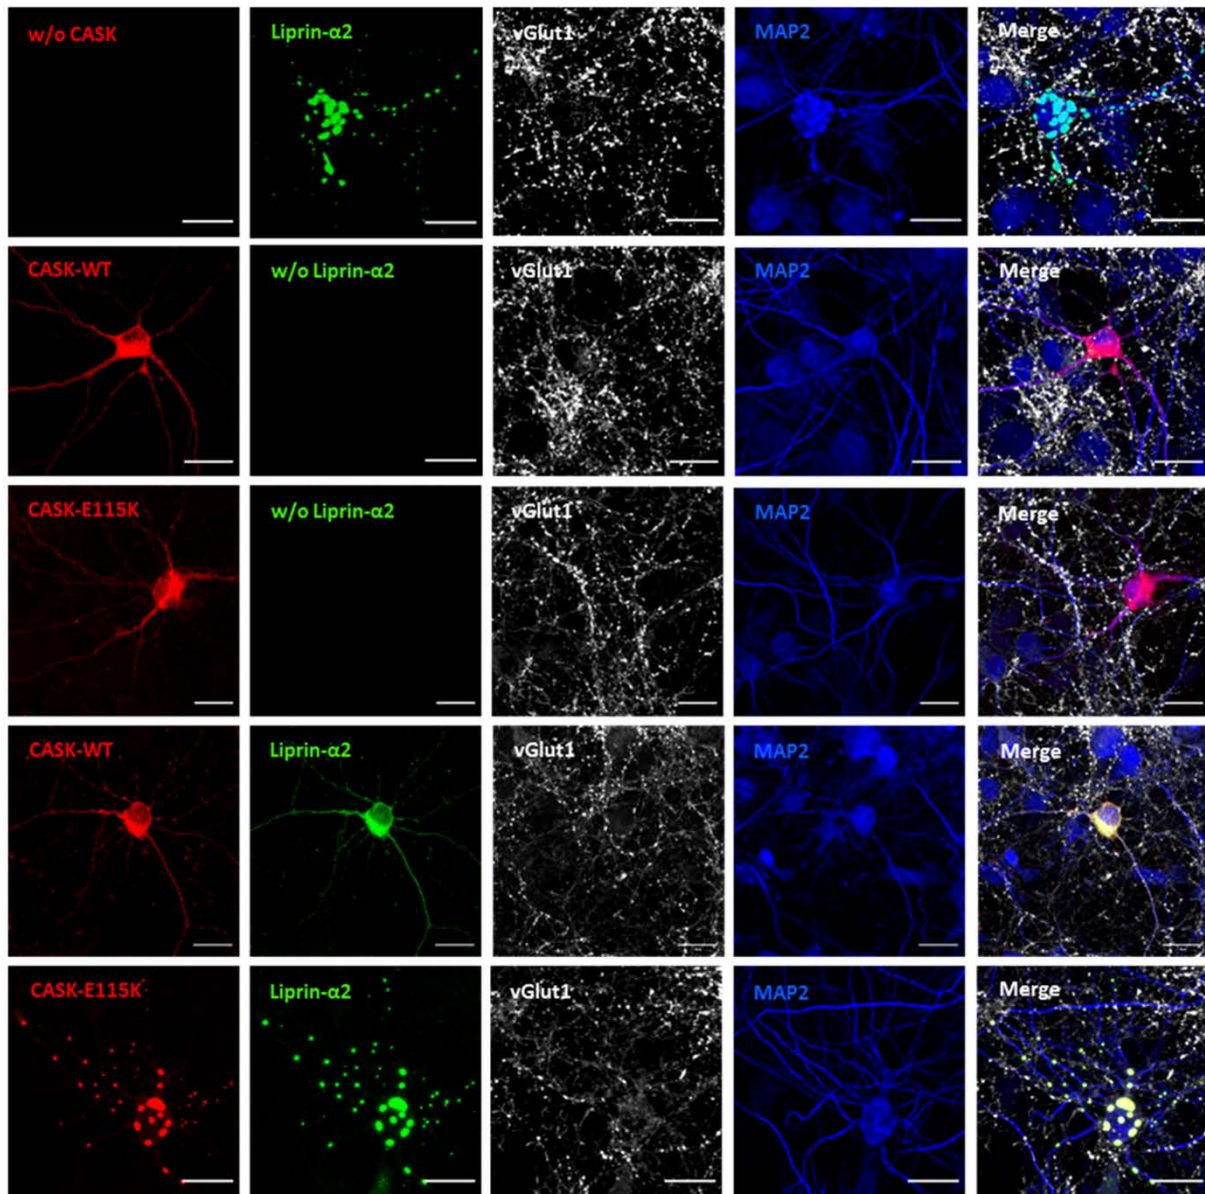

B

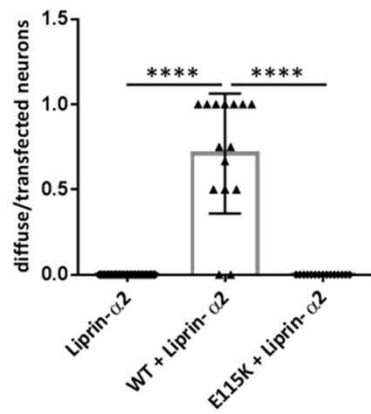

C

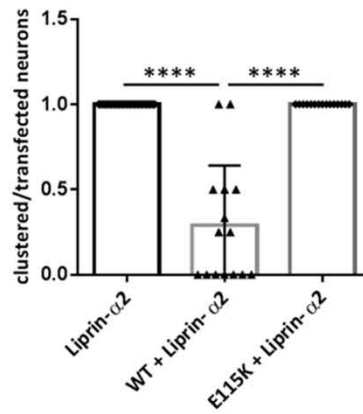

278

279

280

281

**Fig. 8. Interaction with CASK interferes with formation of condensates by Liprin-α2 in hippocampal neurons.**  
A. Hippocampal neurons transfected with constructs coding for either mRFP-CASK or GFP-Liprin-α2, or both proteins in combination, were fixed and stained for the expressed proteins, as well as vGlut1 as a presynaptic

282 marker and MAP2 as a dendrite marker. **B, C.** Quantification of the data shown in A. **B.** Proportion of neurons in  
 283 which Liprin- $\alpha$ 2 was localized diffusely in the cytoplasm of soma and neurites, normalized to the number of  
 284 transfected cells per image. **C.** Number of cells in which Liprin- $\alpha$ 2 showed a localization in clusters in cell soma  
 285 and along the neurites. 15 images per condition were analysed with up to five transfected neurons present and  
 286 the mean  $\pm$  SD is shown with each data point representing one analysed picture. Statistical differences were  
 287 calculated using an ordinary one-way ANOVA with Tukey's test; \*\*\*\*,  $p < 0.0001$ .

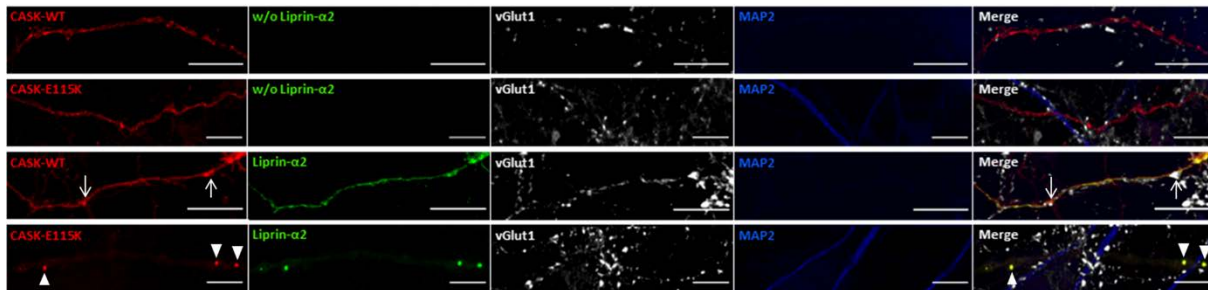

288  
 289 **Fig. 9. Liprin- $\alpha$ 2 condensate-like axonal puncta are not synaptic.** Enlargements of axonal segments of neurons  
 290 shown in Fig. 6. Axons were identified by the absence of MAP2 staining. Arrows point to locations of presynaptic  
 291 sites identified by vGlut1 staining; arrowheads in lower panels point to CASK-Liprin droplets which are devoid of  
 292 a presynaptic vGlut1 cluster, and are therefore considered as non-synaptic.

293 MAGUKs like CASK or PSD-95 are known to oligomerize through their C-terminal PSG tandem domains  
 294 (McGee *et al.*, 2001; Pan *et al.*, 2021; Rademacher *et al.*, 2019). We analysed the relation between CASK  
 295 oligomerization and condensation of Liprin- $\alpha$ 2, by using a split-YFP fluorescent complementation  
 296 assay. Two CASK cDNA variants were expressed, carrying either the N-terminal, or C-terminal half of  
 297 YFP. We have shown before that, upon assembly of CASK oligomers, this leads to complementation of  
 298 YFP fluorescence which is detectable in FACS-based assay format (Pan *et al.*, 2021). We observed here  
 299 low levels of YFP fluorescence when the CASK WT, E115K or N299S constructs were expressed alone  
 300 in 293T cells. Coexpression of Liprin- $\alpha$ 2 led to a strong increase in fluorescence for CASK-WT and the  
 301 N299S variant, but not for the E115K variant (Fig. 10). These data suggest the existence of two different  
 302 states for Liprin- $\alpha$ 2: the Liprin-CASK-WT complex which is characterized by diffusely localized  
 303 oligomers; and Liprin- $\alpha$ 2 alone which forms LLPS-like droplets. The E115K variant fails to dissolve LLPS-  
 304 based droplets into the more diffusely localized CASK-Liprin oligomers.

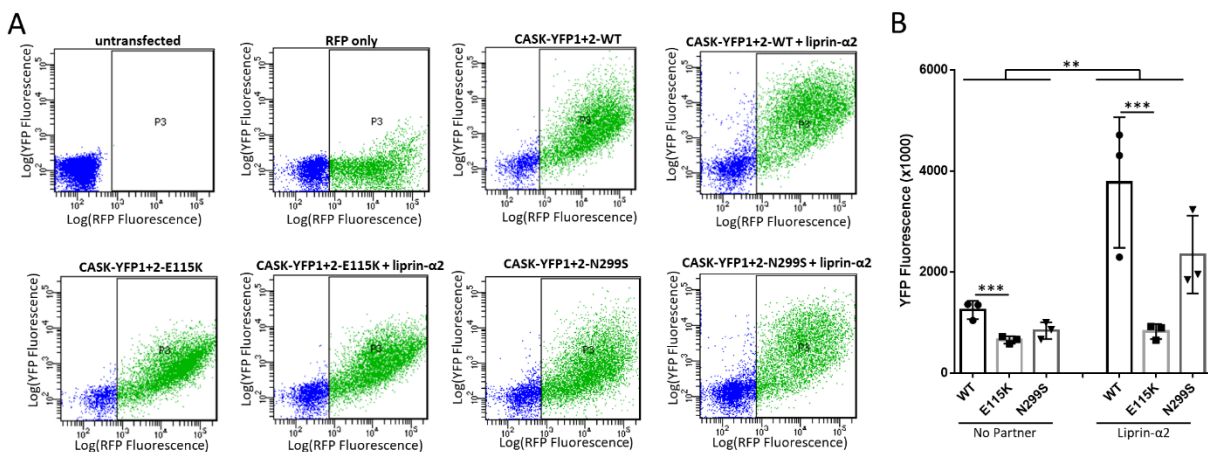

305  
 306 **Fig. 10. Liprin- $\alpha$ 2 induces formation of CASK oligomers.** **A.** HEK293T cells were transfected with plasmids coding  
 307 for mRFP, CASK (WT or mutant) fused to the N- (YFP1) as well as the C-terminal (YFP2) halves of YFP, and Liprin-  
 308  $\alpha$ 2 as indicated. Two days after transfection, cells were harvested, resuspended in PBS and analyzed by flow  
 309 cytometry using filters for mRFP and YFP fluorescence. **B.** Quantification of the data shown in A. Significance was

310 determined by two-way ANOVA with Sidak's multiple comparison test; \*\*,  $p \leq 0.01$ ; \*\*\*,  $p \leq 0.001$ ;  $n=3$ . Mean  $\pm$   
311 *SD* is shown with each data point representing an independent transfection and flow cytometry experiment.

312 We sought additional proof that the dissolution of Liprin- $\alpha 2$  condensates by CASK is due to the direct  
313 interaction of CASK with Liprin. We made use of a mutation in the linker region between Liprin- $\alpha 2$  SAM  
314 domains 1 and 2, W981A. This alteration specifically disrupts binding to CASK, without disrupting other  
315 functions of the Liprin- $\alpha 2$  SAM domains (Wei *et al.*, 2011). By coexpression of WT and mutant Liprin-  
316  $\alpha 2$  with CASK, followed by coimmunoprecipitation we confirmed that this substitution indeed  
317 eliminated the CASK-Liprin interaction (Fig. 11, A and B). In 293T cells, we observed that W981A mutant  
318 Liprin- $\alpha 2$  formed LLPS-like condensates very similar to the WT protein, and that coexpressed CASK-WT  
319 was unable to interfere with this cluster formation. Despite the complete loss of interaction seen in  
320 the biochemical experiment, CASK was recruited to these clusters where it extensively colocalized with  
321 Liprin-W891A (Fig. 11, C-E). We reproduced these results in cultured neurons, where the Liprin- $\alpha 2$   
322 mutant formed LLPS-type condensates throughout the cell. Coexpression of CASK did not alter this  
323 localization, and CASK was again found in the same droplets as Liprin- $\alpha 2$  (Fig. 11, F-H). Thus, we  
324 conclude that, irrespective of the cell type, Liprin- $\alpha 2$  forms large condensates, and a tight interaction  
325 with CASK is required to regulate droplet formation.

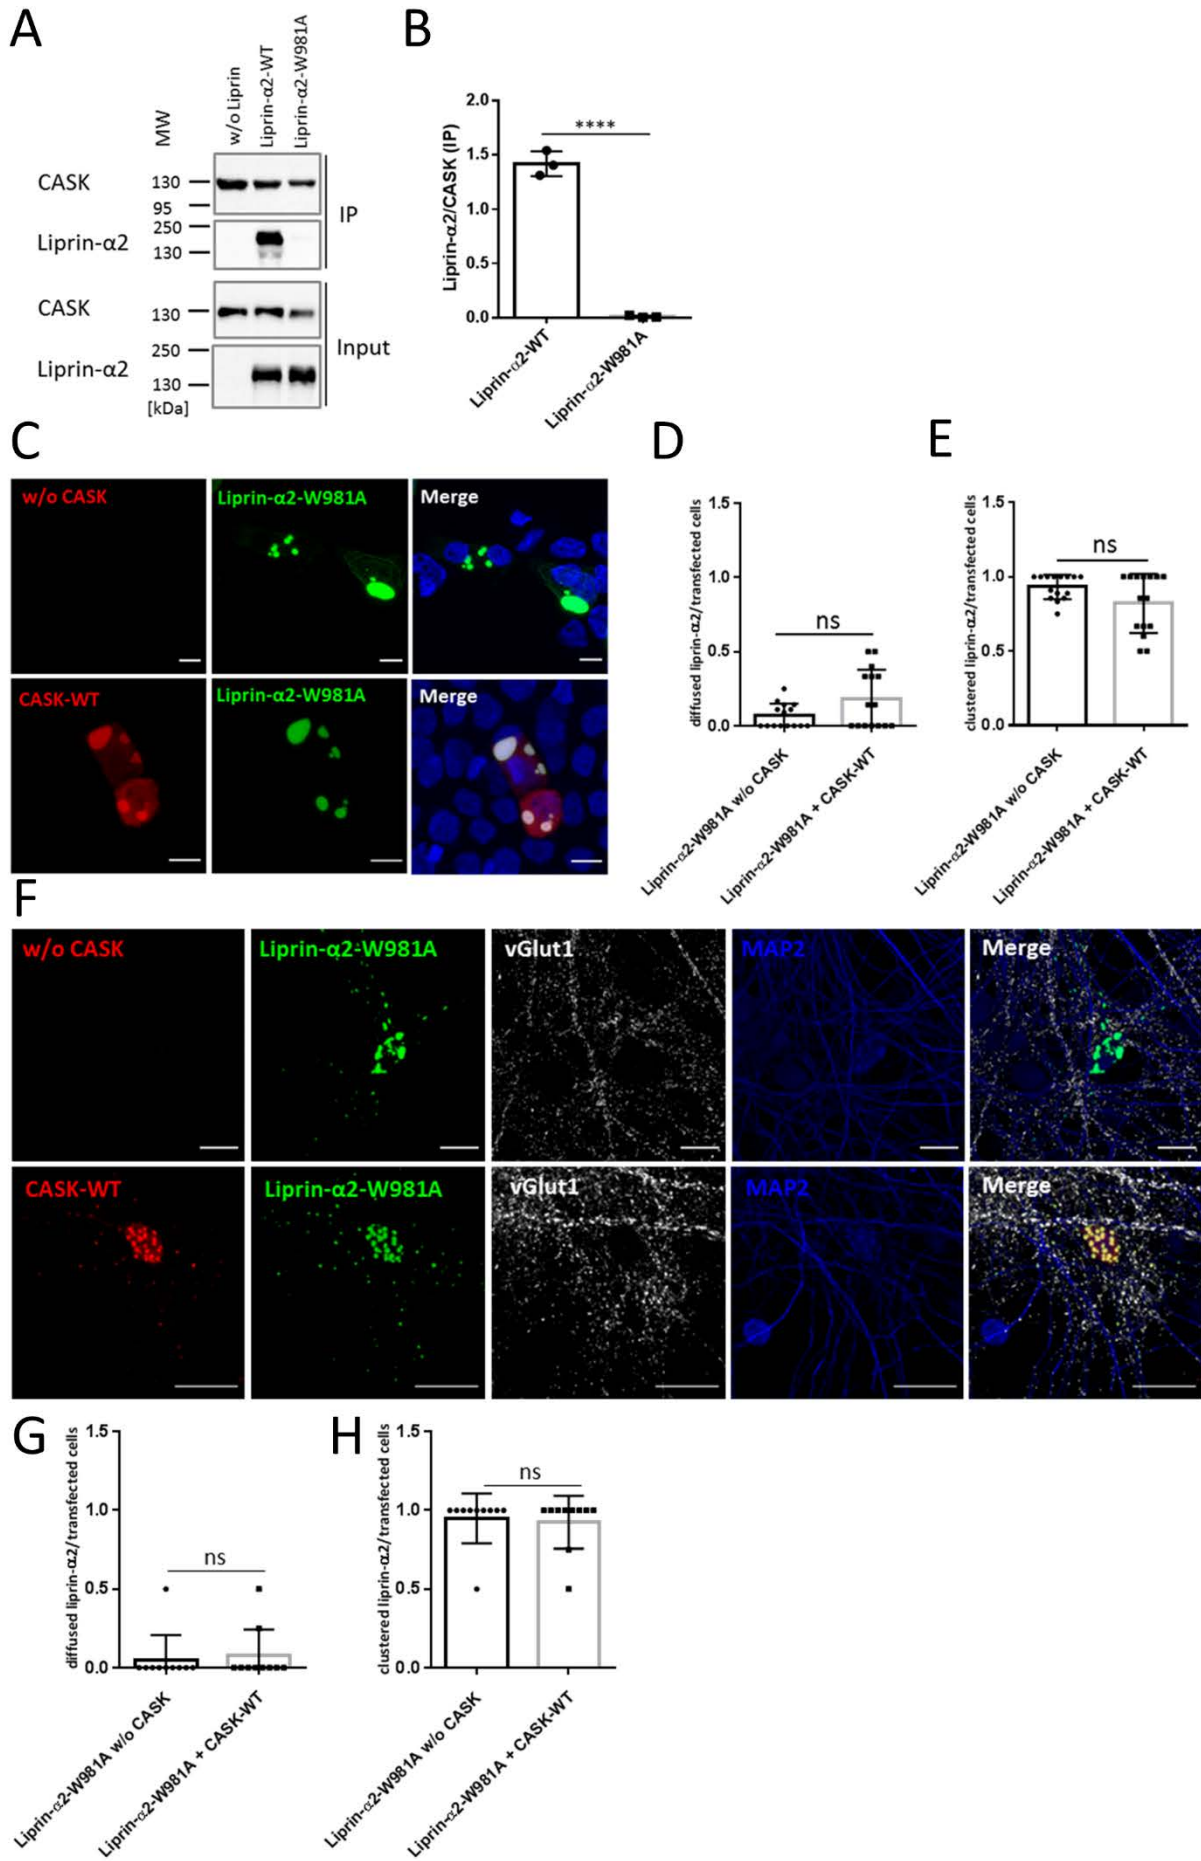



327

328 **Fig. 11. CASK needs to bind Liprin- $\alpha$ 2 to negatively regulate condensate formation.** **A.** mRFP-CASK was  
329 coexpressed with Liprin- $\alpha$ 2-WT or the W981A mutant. After cell lysis and immunoprecipitation of CASK, input  
330 (IN) and precipitate (IP) samples were analysed by western blotting. **B.** Quantification of the data in shown in A  
331 with mean  $\pm$ SD of three independent transfections depicted by single data points; n=3. **C.** Coexpression in  
332 HEK293T cells shows that W981A-mutant Liprin- $\alpha$ 2 localizes to large intracellular clusters in the absence as well  
333 as in the presence of CASK-WT. **D, E.** Quantification of the cell populations shown in C based on the total number  
334 of transfected cells from 15 images. Shown is the mean  $\pm$  SD with one data point per analysed image. **F.**  
335 Localization of W981A mutant Liprin- $\alpha$ 2 and CASK-WT was analysed in primary hippocampal neurons, as before  
336 in Fig. 6. Here, CASK-WT did not alter the localizaton of the Liprin- $\alpha$ 2 mutant. **G, H.** Quantification of hippocampal  
337 neurons as shown in F. 10 images per condition were analysed with up to five transfected neurons present and  
338 the mean  $\pm$  SD is shown with each data point representing one analysed picture. Statistics were done with two-  
339 tailed Student's *t*-test; \*\*\*\*,  $p \leq 0.0001$ ; n=3-6.

340

## 341 Discussion

342 We identified four male patients carrying *CASK* missense variants affecting the CaMK domain. All  
343 patients had a severe neurodevelopmental disorder, characterized by microcephaly, intellectual  
344 disability, and seizures. Patient 1, carrying the E115K variant, in addition showed pontine and  
345 cerebellar hypoplasia, a hallmark of the MICPCH phenotype described for *CASK* loss-of-function  
346 mutations (Moog *et al.*, 2015; Najm *et al.*, 2008). This patient died at a young age. By performing a  
347 thorough functional analysis of all four mutants, our goal was to determine which of the various  
348 functional aspects of the *CASK* CaMK domain is responsible for the patients' phenotype. In addition,  
349 we wanted to find out what was special about the E115K variant, as it causes the additional severe  
350 PCH phenotype.

351 None of the variants appeared to affect folding or stability of overexpressed *CASK* protein. All four  
352 variants did not significantly affect binding to Mint1, to Veli proteins, and to Neurexin. Furthermore,  
353 none of the variants interfered with folding of the isolated CaMK domain prepared from bacteria. This  
354 allowed us to measure  $Mg^{2+}$ -sensitive ATP binding.  $Mg^{2+}$ -sensitivity instead of  $Mg^{2+}$ -dependence  
355 classifies *CASK* as an atypical kinase (Mukherjee *et al.*, 2008). Efficient binding was detected for all four  
356 mutants, similar to the wildtype, though variants R264K and N299S slightly altered the  $Mg^{2+}$  sensitivity  
357 of ATP binding. N299 is located in the kinase regulatory segment in the  $\alpha$ R1 helix. A movement of this  
358 helix with respect to the rest of the domain, induced by the N299S variant, would change the geometry  
359 of the kinase active site, leading to altered binding parameters.

360 All four variants shared a strongly reduced ability to interact with Liprin- $\alpha$ 2, suggesting that a  
361 weakened *CASK*-Liprin connection is responsible for the phenotype of all four patients. Together with  
362 our previous findings, showing that loss of Neurexin binding or Neurexin-induced oligomerization is a  
363 frequent result of pathogenic *CASK* missense variants (Pan *et al.*, 2021), this points strongly to a  
364 presynaptic origin of *CASK*-related neurodevelopmental disorders. But what makes the E115K variant  
365 so devastating?

366 Liprin- $\alpha$  proteins have been shown to be early organizers of presynaptic development by recruiting  
367 ELKS, RIM and *CASK* (Dai *et al.*, 2006; Spangler *et al.*, 2013). The ability of Liprin- $\alpha$  proteins to undergo  
368 LLPS has now been documented in several studies; LLPS is driven by multimerization of its N-terminal  
369 coiled-coil motifs, which leads to a high local concentration of Liprin- $\alpha$  and associated ELKS molecules  
370 (Liang *et al.*, 2021). Furthermore, a central intrinsically disordered region (see Fig. 5, C) in Liprin- $\alpha$

371 proteins from different species contributes to LLPS (Emperador-Melero *et al.*, 2021; McDonald *et al.*,  
372 2020). We observed here that CASK has a regulatory effect on condensate formation. This depends on  
373 the direct interaction of the two proteins, as it can be abolished by mutations E115K in CASK and  
374 W981A in Liprin- $\alpha$ 2. Structurally, we do not know how interaction with CASK negatively affects  
375 condensation of Liprin- $\alpha$ 2 into droplets. CASK binds to the C-terminal part of Liprin- $\alpha$ 2 which has so far  
376 not been implicated in condensation. One aspect may be phosphorylation of the N-terminal coiled-coil  
377 domain of Liprin- $\alpha$ 2 at Ser87, which is reduced upon CASK binding. LLPS of Liprin- $\alpha$ 3 is triggered by a  
378 phosphorylation event, in this case within the IDR region at Ser760, through the activity of protein  
379 kinase C (Emperador-Melero *et al.*, 2021). As S760 is absent in Liprin- $\alpha$ 2, and S87 is absent in Liprin-  
380  $\alpha$ 3, condensation appears to be differentially regulated by phosphorylation events.

381 Upon CASK binding, a long  $\alpha$ -helical segment ( $\alpha$ N-segment in Figs. 1, 5) immediately N-terminal to the  
382 SAM domains of Liprin- $\alpha$  performs a significant outward turn (Wei *et al.*, 2011; Xie *et al.*, 2021). As the  
383  $\alpha$ N-segment is close in sequence to the intrinsically disordered region (IDR), it is conceivable that this  
384 movement of  $\alpha$ N alters the propensity of the IDR to condensate and induce phase separation.

385 Data from *C. elegans* suggest that LLPS mediated by Liprin is an essential step in synapse formation;  
386 however, the Liprin aggregates formed during LLPS are modified at a later stage in synaptogenesis,  
387 leading to some form of solidification of the active zone (McDonald *et al.*, 2020). In this respect, our  
388 findings that CASK can dissolve preformed LLPS like clusters of Liprin- $\alpha$ 2 points to a mechanism where  
389 LLPS is required for early stages of active zone formation, whereas during a later stage CASK and  
390 possibly Neurexin are added to the complex. This likely occurs in the form of CASK oligomers, as  
391 depicted by our split-YFP data that would then allow for restructuring of the large Liprin-based  
392 condensates.

393 Importantly, the inability to regulate phase transitions of Liprin- $\alpha$ 2 is the single functional feature  
394 which distinguishes the CASK E115K variant from the other three investigated variants. E115K caused  
395 a PCH phenotype with early lethality, whereas the other three variants did cause a severe  
396 neurodevelopmental disorder but without PCH. In further studies it will be important to delineate how  
397 the aberrant regulation of LLPS-like condensate formation by Liprin- $\alpha$  proteins contributes to  
398 pontocerebellar hypoplasia.

## 399 **Materials and Methods**

400 **Patients and genetic analysis.** We identified four patients with a CASK missense variant from different  
401 diagnostic and research cohorts from across India and the United States. Genetic testing was  
402 performed by Sanger sequencing of CASK, targeted next-generation sequencing gene panel or exome  
403 sequencing. Clinical and molecular findings in patients 1 to 4 are summarized in Table 1. Informed  
404 consent for genetic analysis was obtained from parents/legal guardians, and genetic studies were  
405 performed clinically or as approved by the Institutional Review Boards of the respective institution.

406 Patients for this study were ascertained over a course of two years. Therefore, in some panels of our  
407 functional assays, only one or two variants are compared with the respective wild type condition.

408 **Expression constructs.** For expression in HEK293T cells, cDNA coding for CASK transcript variant 3 (TV3;  
409 (Tibbe *et al.*, 2021)) fused to an N-terminal mRFP-tag in pmRFP-N1 was used. For expression in neurons,  
410 cDNAs coding for mRFP-CASK-TV5 fusion proteins were inserted into a vector carrying the human  
411 synapsin promoter (Repetto *et al.*, 2018; Tibbe *et al.*, 2021). For the preparation of fusion proteins, the  
412 cDNA encoding the CaMK domain was cloned into the pET-SUMO vector coding for a His<sub>6</sub>-SUMO tag

413 (Thermo Scientific). An expression vector for GFP-Mint1 was obtained from C. Reissner and M. Missler  
414 (Münster, Germany). HA-tagged Neurexin-1 $\beta$  was from P. Scheiffele (Basel, Switzerland) via Addgene  
415 (58267), HA-tagged and GFP-tagged Liprin- $\alpha$ 2 were from C. Hoogenraad (Utrecht, The Netherlands).  
416 Mutations were introduced using the Quik-Change II site-directed mutagenesis kit (Agilent), using two  
417 complementary, mutagenic oligonucleotides. Constructs were verified by Sanger sequencing.

418 **Antibodies.** For western blotting experiments, all primary antibodies were diluted 1:1,000 in TBS-T  
419 with 5% milk powder (MP). The following antibodies were used:  $\alpha$ -CASK (Rb, Cell Signaling  
420 Technologies, #9497S),  $\alpha$ -GFP (Ms, Covance, #MMS-118P),  $\alpha$ -Veli 1/2/3 (Rb, Synaptic Systems, #184  
421 002),  $\alpha$ -HA (Ms, Sigma, #H9658) and  $\alpha$ -Myc (Ms, Sigma, #M5546). Horse radish peroxidase (HRP)-  
422 coupled secondary antibodies were used in a dilution of 1:2,500 in TBS-T (Gt- $\alpha$ -Ms or Gt- $\alpha$ -Rb,  
423 ImmunoReagents, #BOT-20400 or #BOT-20402). For application in immunocytochemistry of  
424 hippocampal neurons, two primary antibodies, both prepared in 1:1000 dilutions in 2% horse serum  
425 (HS) in PBS, were used:  $\alpha$ -MAP2 (Ck; Antibodies Online, #ABIN 111 291) and  $\alpha$ -vGlut1 (Rb; Synaptic  
426 Systems #135 303). As secondary antibodies we used Alexa-405 (Gt- $\alpha$ -Ck, Abcam #ab175675) and  
427 Alexa-633 (Gt- $\alpha$ -Rb, Thermo Fisher, #A-21071).

428 **Cell culture, transfection and coimmunoprecipitation.** HEK293T cells (ATCC<sup>®</sup>, CRL-3216<sup>™</sup>) were  
429 cultivated on 10 cm dishes in Dulbecco's Modified Eagle Medium (DMEM) supplemented with 1 x  
430 penicillin/streptomycin and 10% fetal bovine serum at 37 °C, 5% CO<sub>2</sub> and humidified air. Cells were  
431 transiently transfected with TurboFect transfection reagent (Thermo Fisher) according to the  
432 manufacturer's instructions. 24 h after transfection, the cells were washed in PBS and lysed in 1 ml of  
433 RIPA buffer supplemented with protease inhibitors (0.125 M phenylmethylsulphonyl fluoride, 5 mg/mL  
434 leupeptin, 1 mg/mL pepstatin A). Lysates cleared by centrifugation (15 min, 4 °C at 20,000 x g) were  
435 subjected to immunoprecipitation with 20  $\mu$ L of RFP-Trap agarose beads (ChromoTek, Munich,  
436 Germany) for 2 h at 4 °C under rotation. The beads were washed five times with RIPA buffer, followed  
437 by centrifugation (1 min, 4 °C, 1000 x g) and immunoprecipitate (IP) and input samples (IN) were  
438 processed for western blotting. Protein bands were detected by chemoluminescence with a BioRad  
439 imaging system in the "auto-mode", avoiding over-saturation while maximizing signal intensity. Band  
440 intensities were quantified using ImageLab 6.0 software.

441 **Bacterial expression and purification of fusion proteins.** His<sub>6</sub>-SUMO-tagged fusion proteins were  
442 expressed in BL21 (DE3) cells and purified from bacterial lysates prepared in native lysis buffer (50 mM  
443 NaH<sub>2</sub>PO<sub>4</sub>, 500 mM NaCl, pH 8.0) using Ni-NTA agarose (Qiagen, Hilden, Germany). Proteins were  
444 eluted from beads with 250 mM imidazole in lysis buffer and were immediately applied to G-25  
445 columns equilibrated in TNP-ATP-binding buffer (40 mM Tris HCl 100 mM NaCl, 50 mM KCl, pH 7.5),  
446 followed by elution in the same buffer. Efficiency of protein purifications was verified by SDS-PAGE,  
447 followed by Coomassie staining. Protein concentrations were determined by Bradford assay, using BSA  
448 as a standard.

449 **TNP-ATP binding assay.** The binding of 2,4,6-trinitrophenol conjugated ATP (TNP-ATP) to the CaMK  
450 domain of CASK was measured by fluorescence spectroscopy. 1  $\mu$ M TNP-ATP was added to 100  $\mu$ g/mL  
451 soluble protein in TNP-ATP binding buffer. For the detection of magnesium sensitivity, 2 mM Mg<sup>2+</sup> was  
452 added. After 15 min incubation, the fluorescence emission spectra from 500 nm to 600 nm was  
453 measured on a Synergy H1 plate reader.

454 **Cell culture of primary hippocampal neurons.** Primary cultures of hippocampal neurons were  
455 prepared from *Rattus norvegicus* embryonic day 18 (E18) rats (Wistar Unilever outbred rat, strain:

456 HsdCpb:WU; Envigo) regardless of gender, as described before (Hassani Nia *et al*, 2020). Neurons were  
457 isolated using papain neuron isolation enzyme (Thermo scientific, #88285) and cultivated in  
458 neurobasal culture media containing B27 and GlutaMAX supplements (Thermo scientific, #21103049,  
459 #17504044 and #A1286001). Neurons were transfected using the calcium phosphate method after 7  
460 days in vitro (DIV7), as described before (Hassani Nia *et al*, 2020). Cells were cultured until DIV14  
461 before fixation and staining.

462 Animal experiments were approved by, and conducted in accordance with, the guidelines of the  
463 Animal Welfare Committee of the University Medical Center (Hamburg, Germany) under permission  
464 number Org1018.

465 **Immunocytochemistry and confocal microscopy.** Transfected HEK293T cells were transferred to PLL-  
466 coated coverslips in 12 well plates one day before fixation. Hippocampal neurons were cultured and  
467 transfected on PLL-coated coverslips in 12 well plates. For ICC, cells were washed three times with PBS  
468 and fixed in 4% PFA with 4% Sucrose in PBS for 15 min at room temperature (RT). The cells were washed  
469 again three times with cold PBS, followed by permeabilization in 0.1% Triton-X 100 in PBS for 3 min at  
470 RT. After washing with PBS, cells were incubated in 10% HS in PBS for 1 h at RT to reduce unspecific  
471 antibody binding. Primary antibodies were prepared in 2% HS in PBS and the cells were incubated with  
472 the antibody solution overnight at 4 °C in a humidified atmosphere. After washing with PBS, cells were  
473 incubated with secondary antibodies diluted in PBS for 1 h at RT. After washing three times with PBS  
474 and once with ddH<sub>2</sub>O, coverslips were mounted with ProLong Diamond Antifade mounting medium  
475 (Thermo Fisher, #P36961). Samples were analysed by confocal microscopy, using a Leica SP8 confocal  
476 microscope (provided by UKE Microscopy Imaging Facility; UMIF).

477 **FastAP dephosphorylation assay.** HEK293T cells expressing HA-Liprin- $\alpha$ 2 alone or together with mRFP-  
478 CASK-wildtype (WT) were lysed in IP buffer without EDTA. Cleared lysates were treated with or without  
479 FastAP Thermosensitive Alkaline Phosphatase (Thermo Scientific, EF0651), as described in the  
480 manufacturer's protocol for protein dephosphorylation. After incubation at 37 °C for 1 h under shaking,  
481 samples were analysed by immunoblotting.

482 **Sample preparation for proteome analysis.** HA-tagged Liprin- $\alpha$ 2 was immunoprecipitated from  
483 transfected cells using HA-specific magnetic beads. After washing, samples were diluted in 1% w/v  
484 sodium deoxycholate (SDC) in 100 mM triethyl bicarbonate buffer and boiled at 95 °C for 5 min.  
485 Disulfide bonds were reduced in the presence of 10 mM dithiothreitol (DTT) at 60 °C for 30 min.  
486 Cysteine residues were alkylated in presence of 20 mM iodoacetamide at 37 °C in the dark for 30 min  
487 and tryptic digestion (sequencing grade, Promega) was performed at a 100:1 protein to enzyme ration  
488 at 37 °C over night. Digestion was stopped and SDC precipitated by the addition of 1% v/v formic acid  
489 (FA). Samples were centrifuged at 16,000 g for 5 min and the supernatant was transferred into a new  
490 tube. Samples were dried in a vacuum centrifuge.

491 **LC-MS/MS in Data Dependent mode.** Samples were resuspended in 0.1% formic acid (FA) and  
492 transferred into a full recovery autosampler vial (Waters). Chromatographic separation was achieved  
493 on a UPLC system (nanoAcquity, Waters) with a two-buffer system (buffer A: 0.1% FA in water, buffer  
494 B: 0.1% FA in ACN). Attached to the UPLC was a C18 trap column (Symmetry C18 Trap Column, 100Å,  
495 5  $\mu$ m, 180  $\mu$ m x 20 mm, Waters) for online desalting and sample purification followed by an C18  
496 separation column (BEH130 C18 column, 75  $\mu$ m x 25 cm, 130 Å pore size, 1.7  $\mu$ m particle size, Waters).  
497 Peptides were separation using a 60 min gradient with increasing acetonitrile concentration from 2%  
498 - 30%. The eluting peptides were analyzed on a quadrupole orbitrap mass spectrometer (QExactive,  
499 Thermo Fisher Scientific) in data dependent acquisition (DDA).

500 **Data analysis and processing.** Acquired DDA LC-MS/MS data were searched against the reviewed  
501 human protein database downloaded from Uniprot (release April 2020, 20,365 protein entries, EMBL)  
502 using the Sequest algorithm integrated in the Proteome Discoverer software version 2.4 (Thermo  
503 Fisher Scientific) in label free quantification mode with match between runs enabled, performing  
504 chromatographic retention re-calibration for precursors with a 5 min retention time tolerance, no  
505 scaling, and no normalization for extracted peptide areas was done. Mass tolerances for precursors  
506 was set to 10 ppm and 0.02 Da for fragments. Carbamidomethylation was set as a fixed modification  
507 for cysteine residues and the oxidation of methionine, phosphorylation of serine and threonine, pyro-  
508 glutamate formation at glutamine residues at the peptide N-terminus as well as acetylation of the  
509 protein N-terminus, methionine loss at the protein N-terminus and the acetylation after methionine  
510 loss at the protein N-terminus were allowed as variable modifications. Only peptide with a high  
511 confidence (false discovery rate < 1% using a decoy data base approach) were accepted as identified.

512 **Split-YFP experiments.** HEK293T cells were cotransfected with 3 µg of CASK-YFP1 and CASK-YFP2  
513 expression vectors, in combination with 1 µg of pmRFP-C1 plasmid and either 3 µg of Liprin-α2 or  
514 empty vector. Two days later, cells were trypsinized, centrifuged at 1,000 x g for 5 min, and  
515 resuspended in PBS. Flow cytometry was performed at a FACS Canto-II instrument (BD Biosciences,  
516 Heidelberg, Germany). Transfected cells were identified by mRFP fluorescence, and YFP fluorescence  
517 was quantified from 10,000 fluorescence events from viable single cells for each condition. Aliquots of  
518 cells were additionally analysed by immunoblotting to determine efficient expression of CASK fusion  
519 proteins.

## 520 **Acknowledgements.**

521 We thank Hans-Hinrich Hönck for excellent technical support, UKE microscoping imaging facility (umif)  
522 for providing microscopes, Carsten Reissner and Markus Missler (Münster, Germany), Peter Scheiffele  
523 (Basel, Switzerland) and Caspar Hoogenraad (Utrecht, The Netherlands) for plasmids. We thank the  
524 UKE microscopy imaging facility (umif) for providing confocal microscopes. This work was supported  
525 by grants from Deutsche Forschungsgemeinschaft (KU 1240/10-1 to K.K., KR 1321/7-1 to H.-J.K.), and  
526 by Jordan's Guardian Angels, the Sunderland Foundation and the Brotman Baty Institute (to G.M.M.).

## 527 **Conflict of interest**

528 The authors declare that there is no conflict of interest

## 529 **References**

530 Bourgeron T (2015) From the genetic architecture to synaptic plasticity in autism spectrum disorder.  
531 *Nat Rev Neurosci* 16: 551-563  
532 Bracha D, Walls MT, Brangwynne CP (2019) Probing and engineering liquid-phase organelles. *Nature*  
533 *biotechnology* 37: 1435-1445  
534 Butz S, Okamoto M, Sudhof TC (1998) A tripartite protein complex with the potential to couple synaptic  
535 vesicle exocytosis to cell adhesion in brain. *Cell* 94: 773-782  
536 Dai Y, Taru H, Deken SL, Grill B, Ackley B, Nonet ML, Jin Y (2006) SYD-2 Liprin-alpha organizes  
537 presynaptic active zone formation through ELKS. *Nat Neurosci* 9: 1479-1487  
538 Emperador-Melero J, Wong MY, Wang SSH, de Nola G, Nyitrai H, Kirchhausen T, Kaeser PS (2021) PKC-  
539 phosphorylation of Liprin-alpha3 triggers phase separation and controls presynaptic active zone  
540 structure. *Nat Commun* 12: 3057  
541 Fenton TR, Kim JH (2013) A systematic review and meta-analysis to revise the Fenton growth chart for  
542 preterm infants. *BMC Pediatr* 13: 59

543 González-Roca I, Alonso-Rivero P, Sánchez-Soblechero A, Vázquez-López M (2020) [New mutation in  
544 the CASK gene in a child with microcephaly syndrome and pontocerebellar hypoplasia]. *Revista de*  
545 *neurologia* 71: 161-162

546 Grabrucker AM, Schmeisser MJ, Schoen M, Boeckers TM (2011) Postsynaptic ProSAP/Shank scaffolds  
547 in the cross-hair of synaptopathies. *Trends in cell biology* 21: 594-603

548 Hackett A, Tarpey PS, Licata A, Cox J, Whibley A, Boyle J, Rogers C, Grigg J, Partington M, Stevenson RE  
549 *et al* (2010) CASK mutations are frequent in males and cause X-linked nystagmus and variable XLMR  
550 phenotypes. *Eur J Hum Genet* 18: 544-552

551 Hassani Nia F, Woike D, Kloth K, Kortum F, Kreienkamp HJ (2020) Truncating mutations in SHANK3  
552 associated with global developmental delay interfere with nuclear beta-catenin signaling. *J Neurochem*  
553 Hata Y, Butz S, Sudhof TC (1996) CASK: a novel dlg/PSD95 homolog with an N-terminal calmodulin-  
554 dependent protein kinase domain identified by interaction with neurexins. *J Neurosci* 16: 2488-2494

555 Hsueh YP, Wang TF, Yang FC, Sheng M (2000) Nuclear translocation and transcription regulation by the  
556 membrane-associated guanylate kinase CASK/LIN-2. *Nature* 404: 298-302

557 Jeyifous O, Waites CL, Specht CG, Fujisawa S, Schubert M, Lin EI, Marshall J, Aoki C, de Silva T,  
558 Montgomery JM *et al* (2009) SAP97 and CASK mediate sorting of NMDA receptors through a previously  
559 unknown secretory pathway. *Nat Neurosci* 12: 1011-1019

560 LaConte LE, Chavan V, Liang C, Willis J, Schonhense EM, Schoch S, Mukherjee K (2016) CASK stabilizes  
561 neurexin and links it to liprin-alpha in a neuronal activity-dependent manner. *Cell Mol Life Sci* 73: 3599-  
562 3621

563 LaConte LEW, Chavan V, DeLuca S, Rubin K, Malc J, Berry S, Gail Summers C, Mukherjee K (2019) An N-  
564 terminal heterozygous missense CASK mutation is associated with microcephaly and bilateral retinal  
565 dystrophy plus optic nerve atrophy. *Am J Med Genet A* 179: 94-103

566 Li Y, Wei Z, Yan Y, Wan Q, Du Q, Zhang M (2014) Structure of Crumbs tail in complex with the PALS1  
567 PDZ-SH3-GK tandem reveals a highly specific assembly mechanism for the apical Crumbs complex. *Proc*  
568 *Natl Acad Sci U S A* 111: 17444-17449

569 Liang M, Jin G, Xie X, Zhang W, Li K, Niu F, Yu C, Wei Z (2021) Oligomerized liprin-alpha promotes phase  
570 separation of ELKS for compartmentalization of presynaptic active zone proteins. *Cell Rep* 36: 109476

571 McDonald NA, Fetter RD, Shen K (2020) Assembly of synaptic active zones requires phase separation  
572 of scaffold molecules. *Nature* 588: 454-458

573 McGee AW, Dakoji SR, Olsen O, Bredt DS, Lim WA, Prehoda KE (2001) Structure of the SH3-guanylate  
574 kinase module from PSD-95 suggests a mechanism for regulated assembly of MAGUK scaffolding  
575 proteins. *Mol Cell* 8: 1291-1301

576 Moog U, Bierhals T, Brand K, Bautsch J, Biskup S, Brune T, Denecke J, de Die-Smulders CE, Evers C,  
577 Hempel M *et al* (2015) Phenotypic and molecular insights into CASK-related disorders in males.  
578 *Orphanet J Rare Dis* 10: 44

579 Mukherjee K, Sharma M, Jahn R, Wahl MC, Sudhof TC (2010) Evolution of CASK into a Mg<sup>2+</sup>-sensitive  
580 kinase. *Sci Signal* 3: ra33

581 Mukherjee K, Sharma M, Urlaub H, Bourenkov GP, Jahn R, Sudhof TC, Wahl MC (2008) CASK Functions  
582 as a Mg<sup>2+</sup>-independent neurexin kinase. *Cell* 133: 328-339

583 Najm J, Horn D, Wimplinger I, Golden JA, Chizhikov VV, Sudi J, Christian SL, Ullmann R, Kuechler A, Haas  
584 CA *et al* (2008) Mutations of CASK cause an X-linked brain malformation phenotype with microcephaly  
585 and hypoplasia of the brainstem and cerebellum. *Nat Genet* 40: 1065-1067

586 Olsen O, Moore KA, Fukata M, Kazuta T, Trinidad JC, Kauer FW, Streuli M, Misawa H, Burlingame AL,  
587 Nicoll RA *et al* (2005) Neurotransmitter release regulated by a MALS-liprin-alpha presynaptic complex.  
588 *J Cell Biol* 170: 1127-1134

589 Pan YE, Tibbe D, Harms FL, Reissner C, Becker K, Dingmann B, Mirzaa G, Kattentidt-Mouravieva AA,  
590 Shoukier M, Aggarwal S *et al* (2021) Missense mutations in CASK, coding for the calcium-/calmodulin-  
591 dependent serine protein kinase, interfere with neurexin binding and neurexin-induced  
592 oligomerization. *J Neurochem* 157: 1331-1350

593 Rademacher N, Kuroпка B, Kunde SA, Wahl MC, Freund C, Shoichet SA (2019) Intramolecular domain  
594 dynamics regulate synaptic MAGUK protein interactions. *Elife* 8

595 Repetto D, Brockhaus J, Rhee HJ, Lee C, Kilimann MW, Rhee J, Northoff LM, Guo W, Reissner C, Missler  
596 M (2018) Molecular Dissection of Neurobeachin Function at Excitatory Synapses. *Front Synaptic*  
597 *Neurosci* 10: 28  
598 Spangler SA, Schmitz SK, Kevenaar JT, de Graaff E, de Wit H, Demmers J, Toonen RF, Hoogenraad CC  
599 (2013) Liprin-alpha2 promotes the presynaptic recruitment and turnover of RIM1/CASK to facilitate  
600 synaptic transmission. *J Cell Biol* 201: 915-928  
601 Sudhof TC (2008) Neuroligins and neuexins link synaptic function to cognitive disease. *Nature* 455:  
602 903-911  
603 Sudhof TC (2012) The presynaptic active zone. *Neuron* 75: 11-25  
604 Tabuchi K, Biederer T, Butz S, Sudhof TC (2002) CASK participates in alternative tripartite complexes in  
605 which Mint 1 competes for binding with caskin 1, a novel CASK-binding protein. *J Neurosci* 22: 4264-  
606 4273  
607 Tibbe D, Pan YE, Reissner C, Harms FL, Kreienkamp HJ (2021) Functional analysis of CASK transcript  
608 variants expressed in human brain. *PLoS One* 16: e0253223  
609 Wei Z, Zheng S, Spangler SA, Yu C, Hoogenraad CC, Zhang M (2011) Liprin-mediated large signaling  
610 complex organization revealed by the liprin-alpha/CASK and liprin-alpha/liprin-beta complex  
611 structures. *Mol Cell* 43: 586-598  
612 Wu X, Cai Q, Chen Y, Zhu S, Mi J, Wang J, Zhang M (2020) Structural Basis for the High-Affinity  
613 Interaction between CASK and Mint1. *Structure* 28: 664-673 e663  
614 Xie X, Liang M, Yu C, Wei Z (2021) Liprin-alpha-Mediated Assemblies and Their Roles in Synapse  
615 Formation. *Front Cell Dev Biol* 9: 653381  
616 Zhang Z, Li W, Yang G, Lu X, Qi X, Wang S, Cao C, Zhang P, Ren J, Zhao J *et al* (2020) CASK modulates  
617 the assembly and function of the Mint1/Munc18-1 complex to regulate insulin secretion. *Cell Discov*  
618 6: 92  
619  
620

| Patient #                                        | 1                                             | 2                                                                                                                                                               | 3                                                                                                                                                                                                                                                                                                           | 4                                                                  |
|--------------------------------------------------|-----------------------------------------------|-----------------------------------------------------------------------------------------------------------------------------------------------------------------|-------------------------------------------------------------------------------------------------------------------------------------------------------------------------------------------------------------------------------------------------------------------------------------------------------------|--------------------------------------------------------------------|
| Variant<br>(NM_003688.3)                         | c.343G>A<br>p.(Glu115Lys)                     | c.763C>T<br>p.(Arg255Cys)                                                                                                                                       | c.791G>A<br>p.(Arg264Lys)                                                                                                                                                                                                                                                                                   | c.896A>G<br>p.(Asn299Ser)                                          |
| Inheritance                                      | <i>de novo</i>                                | Maternally inherited<br>(somatic mosaicism)                                                                                                                     | Unknown (adopted)                                                                                                                                                                                                                                                                                           | Maternally inherited                                               |
| Sex                                              | Male                                          | Male                                                                                                                                                            | Male                                                                                                                                                                                                                                                                                                        | Male                                                               |
| <b>Pregnancy and birth</b>                       |                                               |                                                                                                                                                                 |                                                                                                                                                                                                                                                                                                             |                                                                    |
| Pregnancy                                        | Unremarkable                                  | Class III obesity;<br>hypothyroidism –<br>levothyroxine;<br>anxiety/depression – Zoloft<br>Iron; prenatal multivitamin;<br>scheduled repeat cesarean<br>section | Delivered at 34 weeks of<br>gestation, twin pregnancy;<br>twin sister is alive and well<br>without any medical or<br>neurological issues; previous<br>medical history is limited due<br>to the social circumstances as<br>child has been adopted and<br>there is limited contact with<br>biological parents | Uncomplicated pregnancy; birth via<br>spontaneous vaginal delivery |
| Birth at                                         | Full term                                     | 39 weeks, NICU for 5 weeks                                                                                                                                      | 34 weeks                                                                                                                                                                                                                                                                                                    | 37 weeks                                                           |
| Birth weight<br>(centile, z-score <sup>b</sup> ) | 1750 g<br>(<3 <sup>rd</sup> centile, -4.25 z) | 2480 g<br>(1 <sup>st</sup> centile, -2.32 z)                                                                                                                    | ND                                                                                                                                                                                                                                                                                                          | 3.27 kg<br>(65 <sup>th</sup> centile, 0.38 z)                      |
| Birth length<br>(centile, z-score <sup>b</sup> ) | ND                                            | 46.5 cm<br>(1 <sup>st</sup> centile, -2.57 z)                                                                                                                   | ND                                                                                                                                                                                                                                                                                                          | 49.5 cm<br>(31 <sup>st</sup> centile, -0.29 z)                     |
| OFC birth<br>(centile, z-score <sup>b</sup> )    | ND                                            | 32 cm<br>(1 <sup>st</sup> centile, -2.54 z)                                                                                                                     | ND                                                                                                                                                                                                                                                                                                          | ND                                                                 |
| <b>Last examination</b>                          |                                               |                                                                                                                                                                 |                                                                                                                                                                                                                                                                                                             |                                                                    |
| Age                                              | 39 mo                                         | 19 mo                                                                                                                                                           | 14 y                                                                                                                                                                                                                                                                                                        | 3 y 4 mo                                                           |
| Weight<br>(centile, z-score <sup>c</sup> )       | 9 kg<br>(<3 <sup>rd</sup> centile, -4.21 z)   | 9.5 kg<br>(2 <sup>nd</sup> centile, -1.98 z)                                                                                                                    | 37.2 kg<br>(2 <sup>nd</sup> centile; -1.98 z)                                                                                                                                                                                                                                                               | 14.1 kg<br>(26 <sup>th</sup> centile, -0.65 z)                     |



|                                            |                                              |                                                                                                                                                                                  |                                                                                                                                                                                                                             |                                                                                   |
|--------------------------------------------|----------------------------------------------|----------------------------------------------------------------------------------------------------------------------------------------------------------------------------------|-----------------------------------------------------------------------------------------------------------------------------------------------------------------------------------------------------------------------------|-----------------------------------------------------------------------------------|
| Height<br>(centile, z-score <sup>c</sup> ) | ND                                           | 79.5 cm<br>(7 <sup>th</sup> centile, -1.49 z)                                                                                                                                    | 134 cm<br>(<1 <sup>st</sup> centile; -3.81 z)                                                                                                                                                                               | 94.5 cm<br>(11 <sup>th</sup> centile, -1.25 z)                                    |
| OFC<br>(centile, z-score <sup>c</sup> )    | 40 cm<br>(<3 <sup>rd</sup> centile, -8.64 z) | 39 cm<br>(<1 <sup>st</sup> centile, -8.11 z)                                                                                                                                     | 49.7 cm<br>(<1 <sup>st</sup> centile; -3.94 z)                                                                                                                                                                              | 46.2 cm<br>(<1 <sup>st</sup> centile, -3.88 z)                                    |
| <b>Development</b>                         |                                              |                                                                                                                                                                                  |                                                                                                                                                                                                                             |                                                                                   |
| DD/ID                                      | Severe global                                | Severe delays<br>(sometimes rolling back to belly, showing an interest in toys, making some eye contact, moving arms and legs, able to sit with moderate to significant support) | Severe global                                                                                                                                                                                                               | Severe global                                                                     |
| Motor development                          | No head control                              | Severe delays<br>(doesn't sit independently)                                                                                                                                     | Non-ambulatory                                                                                                                                                                                                              | Sits without support as of age 2; does not reach or grasp, no purposeful hand use |
| Speech impairment                          | Non-verbal                                   | Severe delays<br>(nonverbal, no social smiles or interactive speech)                                                                                                             | Non-verbal                                                                                                                                                                                                                  | Vocalizes only                                                                    |
| <b>Neurological features</b>               |                                              |                                                                                                                                                                                  |                                                                                                                                                                                                                             |                                                                                   |
| Muscular hypotonia and/or hypertonia       | Hypotonia                                    | Severe hypotonia<br>(sits with moderate support in tripod position, head is facing down, trying to roll, does not push up from belly)                                            | Increased tone in the upper and lower extremities, specifically with more involvement of the lower extremities;<br>Deep tendon reflexes were 3+ in the lower extremities and 2+ in the upper extremities;<br>kyphoscoliosis | Hypotonia, severe, diffuse, axial and appendicular                                |
| Seizures                                   | Yes                                          | No                                                                                                                                                                               | Yes                                                                                                                                                                                                                         | Yes                                                                               |

|                       |                                                                                                                                                                                                                                                 |                                                                                                                                                                                                            |                                                                                                                                                                                                                                                                                                                     |                                                                                         |
|-----------------------|-------------------------------------------------------------------------------------------------------------------------------------------------------------------------------------------------------------------------------------------------|------------------------------------------------------------------------------------------------------------------------------------------------------------------------------------------------------------|---------------------------------------------------------------------------------------------------------------------------------------------------------------------------------------------------------------------------------------------------------------------------------------------------------------------|-----------------------------------------------------------------------------------------|
| Seizure onset         | 9 mo                                                                                                                                                                                                                                            | ND                                                                                                                                                                                                         | ND                                                                                                                                                                                                                                                                                                                  | 18 mo                                                                                   |
| Seizure type          | Stiffening of upper and lower limbs with occasional head drops                                                                                                                                                                                  | ND                                                                                                                                                                                                         | Severe complex epilepsy characterized by tonic-clonic seizures, absence, tonic and myoclonic                                                                                                                                                                                                                        | Generalized tonic seizures 2-3x a week; history of infantile spasms                     |
| EEG                   | Bilateral parieto-temporal epileptiform abnormalities                                                                                                                                                                                           | Normal at 18 mo of age                                                                                                                                                                                     | Abnormal: Frequent interictal generalized epileptiform transients, often occurring in runs, background activity: diffusely slow and poorly organized                                                                                                                                                                | Slow spike and wave complexes, multiregional sharps and continuous generalized slow     |
| Response to treatment | No improvement in development after initiation of therapy for seizures                                                                                                                                                                          | ND                                                                                                                                                                                                         | Intractable                                                                                                                                                                                                                                                                                                         | Infantile spasms resolved on Vigabatrin; currently 2-3 seizures a week on valproic acid |
| MRI or CT scan        | Pontocerebellar hypoplasia with mild pontine hypoplasia, moderate hypoplasia of inferior vermis and severe cerebellar hypoplasia; small cerebellar peduncles; mild cerebral atrophy; hypoplasia of optic nerve, optic tracts, and optic chiasma | Brain MRI at age 1 mo: normal; Brain MRI at age 18 mo: somewhat delayed myelination, volume loss with resultant mild prominence of the ventricular system, suspected arachnoid cyst in the posterior fossa | Microcephaly with cerebellar vermis hypoplasia that spared the cerebellar hemispheres; the cortical gyral pattern appeared normal; cerebellar basal ganglia and thalami were normal, and the cortical gyral pattern otherwise appeared normal overall and did not show any distinctive cortical brain malformations | <i>Arachnoid cyst of the left cerebellopontine angle</i>                                |
| <b>Other findings</b> |                                                                                                                                                                                                                                                 |                                                                                                                                                                                                            |                                                                                                                                                                                                                                                                                                                     |                                                                                         |
| Hearing               | Auditory evoked response study showed poorly formed wave I from right ear and poorly formed                                                                                                                                                     | No known abnormalities                                                                                                                                                                                     | ND                                                                                                                                                                                                                                                                                                                  | Unable to test; no <i>auditory</i> brainstem response completed                         |

|                          |                                                                                                                             |                                                                                        |                                                                                                                                                     |                                                                        |
|--------------------------|-----------------------------------------------------------------------------------------------------------------------------|----------------------------------------------------------------------------------------|-----------------------------------------------------------------------------------------------------------------------------------------------------|------------------------------------------------------------------------|
|                          | wave I, III and V from left ear at 85dB                                                                                     |                                                                                        |                                                                                                                                                     |                                                                        |
| Eye findings             | Fundus evaluation showed bilateral optic disc pallor; visual evoked potential showed poorly formed waveforms from both eyes | Does not track, bilateral nystagmus, bilateral cortical blindness                      | Optic nerve hypoplasia, cortical visual impairment                                                                                                  | Cortical vision impairment                                             |
| Feeding                  | On oral feeds                                                                                                               | G tube-dependent                                                                       | History of feeding difficulties, including dysphagia, as well as episodic vomiting; these issues have been stable over time                         | Pureed foods by mouth                                                  |
| Craniofacial dysmorphism | Brachycephaly, large ears, micrognathia, strabismus, short nose, finger joint hypermobility                                 | No                                                                                     | Deep-set eyes with blue irises bilaterally, relatively large mouth with increased space between the teeth, ears appeared mildly laterally prominent | Myopathic and dull facies                                              |
| Additional findings      | Dysphagia for liquids, deceased at age 4 y 9 mo                                                                             | Murmur of ventricular septal defect, obstructive sleep apnea requiring oxygen at night | Short stature, sleep issues                                                                                                                         | Left moderate hydronephrosis due to ureteropelvic junction obstruction |

**Table 1.** Clinical features in four male patients with a CASK missense variant. <sup>a</sup> centiles and z-scores of birth parameters were calculated based on data of (Fenton & Kim, 2013). <sup>b</sup> centiles and z-scores were calculated according to Kromeyer-Hauschild, Wabitsch, Kunze et al. *Monatsschr Kinderheilkd* (2001), 149: 807. <https://doi.org/10.1007/s001120170107>. DD, developmental delay; ID, intellectual disability; mo, months; ND, no data; NICU, neonatal intensive care unit; OFC, occipitofrontal head circumference; y, year(s)

| position | tryptic peptide                    | modification                                | Position in Liprin- $\alpha$ | Exp1 | Exp2 | Exp3 |
|----------|------------------------------------|---------------------------------------------|------------------------------|------|------|------|
| 63-75    | [R].LQDVIYDRDSLQR.[Q]              | 1xPhospho [S10]                             | 1xPhospho [S72]              | up   | down | up   |
| 76-96    | [R].QLNSALPQDIESLTGGLAGSK.[G]      | 1xPhospho [S12]                             | 1xPhospho [S87]              | n.d. | down | n.d. |
| 76-96    | [R].QLNSALPQDIESLTGGLAGSK.[G]      | 1xPhospho [S12]<br>1xGln->pyro-Glu [N-Term] | 1xPhospho [S87]              | down | down | down |
| 255-279  | [K].RLSNGSIDSTDETSQIVELQELLEK.[Q]  | 1xPhospho [T/S]                             | 1xPhospho [T/S]              | n.d. | n.d. | n.c. |
| 255-279  | [K].RLSNGSIDSTDETSQIVELQELLEK.[Q]  | 3xPhospho [S3; S6; S9]                      | 3xPhospho [S257; S260; S263] | up   | n.d. | Up   |
| 256-279  | [R].LSNGSIDSTDETSQIVELQELLEK.[Q]   | 1xPhospho [S/T]                             | 1xPhospho [S/T]              | up   | n.d. | n.d. |
| 256-279  | [R].LSNGSIDSTDETSQIVELQELLEK.[Q]   | 2xPhospho [S/T]                             | 2xPhospho [S/T]              | n.d. | n.d. | up   |
| 547-556  | [R].THLD TSAELR.[Y]                | 1xPhospho [S6]                              | 1xPhospho [S552]             | n.c. | up   | down |
| 547-570  | [R].THLD TSAELRYVGS LVD SQSDYR.[T] | 1xPhospho [S15]                             | 1xPhospho [S561]             | n.d. | down | n.c. |
| 666-684  | [R].LIQEEK ESTELRAEEIENR.[V]       | 1xPhospho [S8]                              | 1xPhospho [S673]             | n.d. | n.d. | up   |

**Table 2. CASK coexpression alters phosphorylation of Liprin- $\alpha$ 2.** 293T cells expressing Liprin- $\alpha$ 2 alone or in combination with CASK-WT were lysed, and HA-tagged Liprin was immunoprecipitated using anti-HA magnetic beads. Purified samples were analysed by tryptic digestion, followed by mass spectroscopy. Phosphorylated peptides were identified and quantified in three independent experiments (Exp1-3). “up” and “down” denotes increases and decreases in peptide intensity upon coexpression with CASK, respectively; n.c., no change; n.d., not detected.
